# Supplementary material for: Mouse Adaptation of Human Inflammatory Bowel Diseases Microbiota Enhances Colonization Efficiency and Alters Microbiome Aggressiveness Depending on Recipient Colonic Inflammatory Environment
Source: PubMed Central journal article supplement — bioRxiv. 2024 Jan 23:2024.01.23.576862. Preprint. [Version 1] doi: 10.1101/2024.01.23.576862 (PMC10849574; doi:10.1101/2024.01.23.576862), 2024-01-23
Supplement: media-1.pdf [file media-1.pdf]

|                                                                                                                                                                                                                                                                                            |                           |                              |                                  |
|--------------------------------------------------------------------------------------------------------------------------------------------------------------------------------------------------------------------------------------------------------------------------------------------|---------------------------|------------------------------|----------------------------------|
| <b>Supplemental Table 1</b>                                                                                                                                                                                                                                                                |                           |                              |                                  |
| <b>Explanation of analysis:</b> We performed pairwise t-tests to assess differential abundance between groups, excluding genera present in less than 10% of the samples                                                                                                                    |                           |                              |                                  |
| <b>Explanation of tables in tabs:</b> Tabs represent pairwise comparisons of mouse FMT recipient groups. See Fig 1A for detailed experimental design and explanation of nomenclature. Statistics are calculated for differential abundance comparisons between mouse FMT recipient groups. |                           |                              |                                  |
| <b>Nomenclature Explanation</b>                                                                                                                                                                                                                                                            |                           |                              |                                  |
| <b>Donor Input FMT</b>                                                                                                                                                                                                                                                                     | <b>GF Mouse Recipient</b> | <b>Recipient Group Label</b> | <b>Recipient Microbiome Name</b> |
| HM1                                                                                                                                                                                                                                                                                        | WT                        | HM1->WT                      | NIMM-g1                          |
| NIMM-g1                                                                                                                                                                                                                                                                                    | WT                        | NIMM-g1->WT                  | NIMM-g2                          |
| NIMM-g2                                                                                                                                                                                                                                                                                    | WT                        | NIMM-g2->WT                  | NIMM-g3                          |
| HM1                                                                                                                                                                                                                                                                                        | KO                        | HM1->KO                      | IMM-g1                           |
| IMM-g1                                                                                                                                                                                                                                                                                     | KO                        | IMM-g1->KO                   | IMM-g2                           |
| IMM-g2                                                                                                                                                                                                                                                                                     | KO                        | IMM-g2->KO                   | IMM-g3                           |
| HM2                                                                                                                                                                                                                                                                                        | KO                        | HM2->KO                      | ~                                |
| <b>Tabs in Workbook</b>                                                                                                                                                                                                                                                                    |                           |                              |                                  |
| HM1->KO vs HM1->WT                                                                                                                                                                                                                                                                         |                           |                              |                                  |
| HM1->KO vs HM2->KO                                                                                                                                                                                                                                                                         |                           |                              |                                  |
| HM1->KO vs IMM-g1->KO                                                                                                                                                                                                                                                                      |                           |                              |                                  |
| IMM-g1->KO vs IMM-g2->KO                                                                                                                                                                                                                                                                   |                           |                              |                                  |
| IMM-g1->KO vs NIMM-g1->KO                                                                                                                                                                                                                                                                  |                           |                              |                                  |
| IMM-g1->KO vs NIMM-g1->WT                                                                                                                                                                                                                                                                  |                           |                              |                                  |
| HM1->WT vs NIMM-g1->WT                                                                                                                                                                                                                                                                     |                           |                              |                                  |
| NIMM-g1->WT vs NIMM-g2->WT                                                                                                                                                                                                                                                                 |                           |                              |                                  |
| NIMM-g1->KO vs NIMM-g1->WT                                                                                                                                                                                                                                                                 |                           |                              |                                  |

| Operational Taxonomic Unit (Genus) for HM1->KO vs HM1->WT Comparison                                                               | T-value      | P-value     | FDR         | Enriched |
|------------------------------------------------------------------------------------------------------------------------------------|--------------|-------------|-------------|----------|
| d_Bacteria;p_Firmicutes;c_Clostridia;o_Lachnospirales;f_Lachnospiraceae;g_Lachnospiraceae                                          | -8.488550283 | 6.33E-08    | 3.12E-06    | HM1->WT  |
| d_Bacteria;p_Firmicutes;c_Clostridia;o_Lachnospirales;f_Lachnospiraceae;g_Eubacterium_fissicatena_group                            | -9.134589714 | 1.24E-07    | 3.12E-06    | HM1->WT  |
| d_Bacteria;p_Firmicutes;c_Clostridia;o_Lachnospirales;f_Lachnospiraceae;g_Lachnospiraceae_NK4A136_group                            | -9.135735196 | 1.25E-07    | 3.12E-06    | HM1->WT  |
| d_Bacteria;p_Firmicutes;c_Clostridia;o_Lachnospirales;f_Lachnospiraceae;g_Epulosiscium                                             | 7.138571583  | 1.07E-06    | 1.69E-05    | HM1->KO  |
| d_Bacteria;p_Actinobacteriota;c_Coriobacteriia;o_Coriobacteriales;f_Eggerthellaceae;g_Adlercreutzia                                | -7.254382295 | 1.12E-06    | 1.69E-05    | HM1->WT  |
| d_Bacteria;p_Firmicutes;c_Clostridia;o_Lachnospirales;f_Lachnospiraceae;g_Blautia                                                  | -6.773520585 | 2.10E-06    | 2.62E-05    | HM1->WT  |
| d_Bacteria;p_Firmicutes;c_Clostridia;o_Lachnospirales;f_Lachnospiraceae;g_Ruminococcus_gnavus_group                                | 7.951232103  | 3.16E-06    | 3.39E-05    | HM1->KO  |
| d_Bacteria;p_Actinobacteriota;c_Coriobacteriia;o_Coriobacteriales;f_Eggerthellaceae;g_Gordonibacter                                | -6.145960666 | 1.24E-05    | 0.000112071 | HM1->WT  |
| d_Bacteria;p_Firmicutes;c_Clostridia;o_Lachnospirales;f_Lachnospiraceae;g_Lachnoclostridium                                        | -5.788720245 | 1.34E-05    | 0.000112071 | HM1->WT  |
| d_Bacteria;p_Actinobacteriota;c_Coriobacteriia;o_Coriobacteriales;f_Eggerthellaceae;g_Eggerthella                                  | -5.661915153 | 3.94E-05    | 0.000295402 | HM1->WT  |
| d_Bacteria;p_Firmicutes;c_Clostridia;o_Oscillospirales;f_Oscillospiraceae;g_UCG-005                                                | -4.598911261 | 0.000179748 | 0.001225555 | HM1->WT  |
| d_Bacteria;p_Firmicutes;c_Clostridia;o_Oscillospirales;f_Clostridiaceae;g_Clostridium_sensu_stricto_13                             | 4.524472145  | 0.000236423 | 0.001477646 | HM1->KO  |
| d_Bacteria;p_Firmicutes;c_Clostridia;o_Oscillospirales;f_Ruminococcaceae;g_Paludicola                                              | -4.332486538 | 0.000432429 | 0.002494784 | HM1->WT  |
| d_Bacteria;p_Firmicutes;c_Clostridia;o_Oscillospirales;f_Ruminococcaceae;g_Negativibacillus                                        | 4.278339537  | 0.000764954 | 0.004097967 | HM1->KO  |
| d_Bacteria;p_Firmicutes;c_Clostridia;o_Lachnospirales;f_Lachnospiraceae;g_Anaerostipes                                             | -4.139976324 | 0.000900938 | 0.004504692 | HM1->WT  |
| d_Bacteria;p_Proteobacteria;c_Gammaproteobacteria;o_Vibrionales;f_Vibrionaceae;g_Vibrio                                            | -3.745828966 | 0.001400114 | 0.006563034 | HM1->WT  |
| d_Bacteria;p_Firmicutes;c_Clostridia;o_Oscillospirales;f_Ruminococcaceae;g_Phocea                                                  | 3.449202222  | 0.003910844 | 0.017253722 | HM1->KO  |
| d_Bacteria;p_Firmicutes;c_Clostridia;o_Lachnospirales;f_Lachnospiraceae;g_                                                         | -3.208690271 | 0.005289446 | 0.020941013 | HM1->WT  |
| d_Bacteria;p_Firmicutes;c_Clostridia;o_Peptococcales;f_Peptococcaceae;g_uncultured                                                 | 3.295931565  | 0.005305057 | 0.020941013 | HM1->KO  |
| d_Bacteria;p_Firmicutes;c_Clostridia;o_Monoglobales;f_Monoglobaceae;g_Monoglobus                                                   | -2.922851884 | 0.008434306 | 0.031628648 | HM1->WT  |
| d_Bacteria;p_Firmicutes;c_Clostridia;o_Peptostreptococcales-Tissierellales;f_Peptostreptococcaceae;g_Terrisporobacter              | 2.950212748  | 0.010541452 | 0.034754231 | HM1->KO  |
| d_Bacteria;p_Firmicutes;c_Clostridia;o_Lachnospirales;f_Lachnospiraceae;g_Ruminococcus_torques_group                               | -3.01158123  | 0.010549957 | 0.034754231 | HM1->WT  |
| d_Bacteria;p_Firmicutes;c_Clostridia;o_Peptostreptococcales-Tissierellales;f_Anaerovoracaceae;g_Family_XIII_AD3011_group           | -2.816774219 | 0.010657964 | 0.034754231 | HM1->WT  |
| d_Bacteria;p_Firmicutes;c_Clostridia;o_Lachnospirales;f_Lachnospiraceae;g_Lactonifactor                                            | 2.81786847   | 0.013690093 | 0.04278154  | HM1->KO  |
| d_Bacteria;p_Firmicutes;c_Clostridia;o_Oscillospirales;f_Clostridiaceae;g_Clostridium_sensu_stricto_1                              | 3.069360849  | 0.020296601 | 0.060889804 | HM1->KO  |
| d_Bacteria;p_Firmicutes;c_Bacilli;o_Lactobacillales;f_Streptococcaceae;g_Streptococcus                                             | 2.596328893  | 0.021127732 | 0.06094538  | HM1->KO  |
| d_Bacteria;p_Bacteroidota;c_Bacteroidia;o_Bacteroidales;f_Rikenellaceae;g_Alistipes                                                | -2.517879932 | 0.024064763 | 0.066846565 | HM1->WT  |
| d_Bacteria;p_Firmicutes;c_Clostridia;o_Oscillospirales;f_Oscillospiraceae;g_Oscilloibacter                                         | 2.419595914  | 0.032886627 | 0.080808918 | HM1->KO  |
| d_Bacteria;p_Firmicutes;c_Bacilli;o_Erysipelotrichales;f_Erysipelotrichaceae;g_Turicibacter                                        | 2.22759033   | 0.042823474 | 0.110750364 | HM1->KO  |
| d_Bacteria;p_Actinobacteriota;c_Coriobacteriia;o_Coriobacteriales;f_Coriobacteriaceae;g_Collinsella                                | -2.124507252 | 0.047745904 | 0.119364759 | HM1->WT  |
| d_Bacteria;p_Verrucomicrobia;o_Verrucomicrobiales;f_Akkermansiaceae;g_Akkermansia                                                  | -2.001235886 | 0.062939453 | 0.152272869 | HM1->WT  |
| d_Bacteria;p_Firmicutes;c_Clostridia;o_Lachnospirales;f_Lachnospiraceae;g_GCA-900066755                                            | -1.917141007 | 0.069698258 | 0.157373258 | HM1->WT  |
| d_Bacteria;p_Firmicutes;c_Clostridia;o_Oscillospirales;f_Ruminococcaceae;g_Ruminococcus                                            | 1.921115965  | 0.070260433 | 0.157373258 | HM1->KO  |
| d_Bacteria;p_Firmicutes;c_Clostridia;o_Oscillospirales;f_Eubacterium_coprostanoligenes_group;g_Eubacterium_coprostanoligenes_group | 1.904714488  | 0.071342544 | 0.157373258 | HM1->KO  |
| d_Bacteria;p_Firmicutes;c_Clostridia;o_Lachnospirales;f_Lachnospiraceae;g_uncultured                                               | 1.891683194  | 0.077301629 | 0.164910925 | HM1->KO  |
| d_Bacteria;p_Firmicutes;c_Clostridia;o_Lachnospirales;f_Lachnospiraceae;g_Lachnospiraceae_UCG-008                                  | -1.991940783 | 0.080261553 | 0.164910925 | HM1->WT  |
| d_Bacteria;p_Firmicutes;c_Clostridia;o_Oscillospirales;f_Ruminococcaceae;g_Incertae_Sedis                                          | -1.846780654 | 0.083487288 | 0.164910925 | HM1->WT  |
| d_Bacteria;p_Firmicutes;c_Clostridia;o_Oscillospirales;f_Ruminococcaceae;g_Subdoligranulum                                         | 1.863142456  | 0.083554869 | 0.164910925 | HM1->KO  |
| d_Bacteria;p_Firmicutes;c_Clostridia;o_Oscillospirales;f_Ruminococcaceae;g_Faecalibacterium                                        | 1.841035519  | 0.086903937 | 0.167122956 | HM1->KO  |
| d_Bacteria;p_Proteobacteria;c_Gammaproteobacteria;o_Burkholderiales;f_Sutterellaceae;g_Parasutterella                              | 1.777696261  | 0.093397828 | 0.175120928 | HM1->KO  |
| d_Bacteria;p_Bacteroidota;c_Bacteroidia;o_Bacteroidales;f_Tannerellaceae;g_Parabacteroides                                         | -1.959500036 | 0.097762888 | 0.178834551 | HM1->WT  |
| d_Bacteria;p_Firmicutes;c_Bacilli;o_Erysipelotrichales;f_Erysipelatoclostridiaceae;g_Erysipelatoclostridium                        | -1.723035528 | 0.105053803 | 0.187596077 | HM1->WT  |
| d_Bacteria;p_Firmicutes;c_Bacilli;o_Erysipelotrichales;f_Erysipelotrichaceae;g_Clostridium_innocuum_group                          | -1.689270557 | 0.108200975 | 0.18872263  | HM1->WT  |
| d_Bacteria;p_Firmicutes;c_Clostridia;o_Peptostreptococcales-Tissierellales;f_Peptostreptococcaceae;g_Clostridioides                | 1.693141168  | 0.124264566 | 0.211814601 | HM1->KO  |
| d_Bacteria;p_Firmicutes;c_Clostridia;o_Lachnospirales;f_Lachnospiraceae;g_Eisenbergiella                                           | 1.617884358  | 0.134850552 | 0.22475092  | HM1->KO  |
| d_Bacteria;p_Firmicutes;c_Clostridia;o_Lachnospirales;f_Lachnospiraceae;g_Sellimonas                                               | -1.516020725 | 0.145196507 | 0.234861695 | HM1->WT  |
| d_Bacteria;p_Firmicutes;c_Clostridia;o_Oscillospirales;f_Ruminococcaceae;g_Anaerotruncus                                           | -1.506298725 | 0.147695236 | 0.234861695 | HM1->WT  |
| d_Bacteria;p_Firmicutes;c_Clostridia;o_Oscillospirales;f_Ruminococcaceae;g_UBA1819                                                 | -1.546946505 | 0.150311485 | 0.234861695 | HM1->WT  |
| d_Bacteria;p_Firmicutes;c_uncultured;o_uncultured;f_uncultured;g_uncultured                                                        | 1.467462799  | 0.164354338 | 0.249863757 | HM1->KO  |
| d_Bacteria;p_Firmicutes;c_Clostridia;o_Lachnospirales;f_Lachnospiraceae;g_Marvinbryantia                                           | 1.459220545  | 0.166575838 | 0.249863757 | HM1->KO  |
| d_Bacteria;p_Proteobacteria;c_Gammaproteobacteria;o_Enterobacteriales;f_Enterobacteriaceae;g_Escherichia-Shigella                  | 1.354936281  | 0.197656354 | 0.290671108 | HM1->KO  |
| d_Bacteria;p_Firmicutes;c_Bacilli;o_Erysipelotrichales;f_Erysipelotrichaceae;g_Dielma                                              | -1.250680558 | 0.231613284 | 0.334057621 | HM1->WT  |
| d_Bacteria;p_Firmicutes;c_Clostridia;o_Lachnospirales;f_Lachnospiraceae;g_GCA-900066575                                            | -1.236556149 | 0.241293998 | 0.341453771 | HM1->WT  |
| d_Bacteria;p_Firmicutes;c_Clostridia;o_Oscillospirales;f_Oscillospiraceae;g_uncultured                                             | -1.12878595  | 0.274527839 | 0.374356144 | HM1->WT  |
| d_Bacteria;p_Firmicutes;c_Clostridia;o_Oscillospirales;f_Butyricocccaceae;g_Butyricoccus                                           | 1.020982739  | 0.323503001 | 0.426149105 | HM1->KO  |
| d_Bacteria;p_Firmicutes;c_Clostridia;o_Lachnospirales;f_Lachnospiraceae;g_Roseburia                                                | 1            | 0.334281943 | 0.426149105 | HM1->KO  |
| d_Bacteria;p_Actinobacteriota;c_Coriobacteriia;o_Coriobacteriales;f_Eggerthellaceae;g_                                             | 1            | 0.334281943 | 0.426149105 | HM1->KO  |
| d_Bacteria;p_Firmicutes;c_Bacilli;o_Staphylococcales;f_Staphylococcaceae;g_Staphylococcus                                          | 0.98906855   | 0.335237296 | 0.426149105 | HM1->KO  |
| d_Bacteria;p_Firmicutes;c_Clostridia;o_Oscillospirales;f_Ruminococcaceae;g_DTU089                                                  | -1           | 0.355917684 | 0.444897105 | HM1->WT  |
| d_Bacteria;p_Bacteroidota;c_Bacteroidia;o_Bacteroidales;f_Bacteroidaceae;g_Bacteroides                                             | 0.922140617  | 0.373105981 | 0.458736862 | HM1->KO  |
| d_Bacteria;p_Firmicutes;c_Clostridia;o_Oscillospirales;f_Ruminococcaceae;g_uncultured                                              | -0.845682315 | 0.410382339 | 0.496430248 | HM1->WT  |
| d_Bacteria;p_Firmicutes;c_Clostridia;o_Lachnospirales;f_Lachnospiraceae;g_Hungatella                                               | 0.81083642   | 0.427050135 | 0.508393018 | HM1->KO  |
| d_Bacteria;p_Firmicutes;c_Clostridia;o_Lachnospirales;f_Lachnospiraceae;g_Agathobacter                                             | -0.801601825 | 0.440987563 | 0.512652274 | HM1->WT  |
| d_Bacteria;p_Firmicutes;c_Clostridia;o_Oscillospirales;f_Oscillospiraceae;g_Colidextribacter                                       | -0.782595773 | 0.444298637 | 0.512652274 | HM1->WT  |
| Unassigned; ; ; ; ;                                                                                                                | -0.751948976 | 0.466089744 | 0.529647436 | HM1->WT  |
| d_Bacteria;p_Actinobacteriota;c_Actinobacteria;o_Bifidobacteriales;f_Bifidobacteriaceae;g_Bifidobacterium                          | -0.718439805 | 0.487012031 | 0.545162722 | HM1->WT  |
| d_Bacteria;p_Firmicutes;c_Bacilli;o_Lactobacillales;f_Enterococcaceae;g_Enterococcus                                               | -0.558138604 | 0.583017737 | 0.643034269 | HM1->WT  |
| d_Bacteria;p_Firmicutes;c_Clostridia;o_Oscillospirales;f_Clostridium_methylpentosum_group;g_Clostridium_methylpentosum_group       | 0.534227501  | 0.60256167  | 0.654958337 | HM1->KO  |
| d_Bacteria;p_Firmicutes;c_Clostridia;o_Oscillospirales;f_Ruminococcaceae;g_Candidatus_Soleaferrea                                  | 0.38705943   | 0.706997445 | 0.757497262 | HM1->KO  |
| d_Bacteria;p_Firmicutes;c_Clostridia;o_Clostridia_vadinBB60_group;f_Clostridia_vadinBB60_group;g_Clostridia_vadinBB60_group        | -0.240589576 | 0.813879015 | 0.859731354 | HM1->WT  |
| d_Bacteria;p_Firmicutes;c_Clostridia;o_Peptostreptococcales-Tissierellales;f_Anaerovoracaceae;g_Eubacterium_nodatum_group          | 0.188868185  | 0.853371495 | 0.888928641 | HM1->KO  |
| d_Bacteria;p_Firmicutes;c_Clostridia;o_Oscillospirales;f_Oscillospiraceae;g_Flavonifractor                                         | 0.167986622  | 0.869748875 | 0.893577612 | HM1->KO  |
| d_Bacteria;p_Firmicutes;c_Bacilli;o_Erysipelotrichales;f_Erysipelotrichaceae;g_Holdemania                                          | -0.045494883 | 0.964414277 | 0.97446902  | HM1->WT  |
| d_Bacteria;p_Firmicutes;c_Clostridia;o_Oscillospirales;f_Ruminococcaceae;g_                                                        | -0.023778803 | 0.981520909 | 0.981520909 | HM1->WT  |

| Operational Taxonomic Unit (Genus) for HM1->KO vs HM2->KO Comparison                                                                   | T-value      | P-value     | FDR         | Enriched |
|----------------------------------------------------------------------------------------------------------------------------------------|--------------|-------------|-------------|----------|
| d_Bacteria;p_Firmicutes;c_Clostridia;o_Peptostreptococcales-Tissierellales;f_Peptostreptococcaceae;g_Clostridioides                    | 14.26313282  | 2.12E-11    | 1.22E-09    | HM1->KO  |
| d_Bacteria;p_Bacteroidota;c_Bacteroidia;o_Bacteroidales;f_Bacteroidaceae;g_Bacteroides                                                 | -17.87030689 | 3.16E-11    | 1.22E-09    | HM2->KO  |
| d_Bacteria;p_Bacteroidota;c_Bacteroidia;o_Bacteroidales;f_Marinifilaceae;g_Odoribacter                                                 | -24.80141475 | 2.60E-10    | 6.66E-09    | HM2->KO  |
| d_Bacteria;p_Fusobacteriota;c_Fusobacteriia;o_Fusobacteriales;f_Fusobacteriaceae;g_Fusobacterium                                       | -19.0423166  | 3.47E-09    | 6.67E-08    | HM2->KO  |
| d_Bacteria;p_Firmicutes;c_Clostridia;o_Clostridiales;f_Clostridiaceae;g_Clostridium_sensu_stricto_1                                    | 9.98485579   | 7.17E-08    | 1.10E-06    | HM1->KO  |
| d_Bacteria;p_Firmicutes;c_Clostridia;o_Oscillospirales;f_Ruminococcaceae;g_Candidatus_Soleaferrea                                      | 6.972448656  | 5.35E-07    | 6.86E-06    | HM1->KO  |
| d_Bacteria;p_Firmicutes;c_Clostridia;o_Lachnospirales;f_Lachnospiraceae;g_Epulopiscium                                                 | 7.741674625  | 9.37E-07    | 1.03E-05    | HM2->KO  |
| d_Bacteria;p_Bacteroidota;c_Bacteroidia;o_Bacteroidales;f_Tannerellaceae;                                                              | -9.818312334 | 1.88E-06    | 1.81E-05    | HM1->KO  |
| d_Bacteria;p_Firmicutes;c_Clostridia;o_Lachnospirales;f_Lachnospiraceae;g_Eisenbergiella                                               | 5.781160253  | 1.32E-05    | 0.000112899 | HM1->KO  |
| Unassigned; ; ; ; ;                                                                                                                    | 4.912539491  | 0.000141111 | 0.001086554 | HM1->KO  |
| d_Bacteria;p_Firmicutes;c_Bacilli;o_Erysipelotrichales;f_Erysipelotrichaceae;g_Holdemania                                              | -4.206661286 | 0.000652422 | 0.004566953 | HM2->KO  |
| d_Bacteria;p_Firmicutes;c_Clostridia;o_Oscillospirales;f_Ruminococcaceae;                                                              | -4.07876278  | 0.00095628  | 0.005808614 | HM2->KO  |
| d_Bacteria;p_Firmicutes;c_Clostridia;o_Peptostreptococcales-Tissierellales;f_Anaerovoracaceae;g_[Eubacterium]_nodatum_group            | 3.753911257  | 0.000980675 | 0.005808614 | HM1->KO  |
| d_Bacteria;p_Firmicutes;c_Clostridia;o_Clostridiales;f_Clostridiaceae;g_Clostridium_sensu_stricto_13                                   | 3.523369649  | 0.001745827 | 0.009602049 | HM1->KO  |
| d_Bacteria;p_Actinobacteriota;c_Coriobacteriia;o_Coriobacteriales;f_Eggerthellaceae;g_Eggerthella                                      | 3.580994299  | 0.002021722 | 0.010378173 | HM1->KO  |
| d_Bacteria;p_Bacteroidota;c_Bacteroidia;o_Bacteroidales;f_Tannerellaceae;g_Parabacteroides                                             | -3.993899197 | 0.002543243 | 0.012239356 | HM2->KO  |
| d_Bacteria;p_Firmicutes;c_Clostridia;o_Oscillospirales;f_Ruminococcaceae;g_UBA1819                                                     | 3.401552663  | 0.002999929 | 0.013587914 | HM1->KO  |
| d_Bacteria;p_Firmicutes;c_Clostridia;o_Oscillospirales;f_Oscillospiraceae;g_Oscillibacter                                              | -3.18731025  | 0.004157136 | 0.017783306 | HM2->KO  |
| d_Bacteria;p_Firmicutes;c_Bacilli;o_Erysipelotrichales;f_Erysipelatoclostridiaceae;g_Erysipelatoclostridium                            | 3.611739416  | 0.004507559 | 0.018267476 | HM1->KO  |
| d_Bacteria;p_Firmicutes;c_Clostridia;o_Lachnospirales;f_Lachnospiraceae;g_[Ruminococcus]_gnavus_group                                  | 2.944066808  | 0.011738644 | 0.045193781 | HM1->KO  |
| d_Bacteria;p_Firmicutes;c_Clostridia;o_Lachnospirales;f_Lachnospiraceae;g_Lactonifactor                                                | 2.81786847   | 0.013690093 | 0.050197007 | HM1->KO  |
| d_Bacteria;p_Firmicutes;c_Clostridia;o_Lachnospirales;f_Lachnospiraceae;                                                               | -2.50677523  | 0.020257547 | 0.070731972 | HM2->KO  |
| d_Bacteria;p_Firmicutes;c_Bacilli;o_Lactobacillales;f_Streptococcaceae;g_Streptococcus                                                 | 2.596328893  | 0.021127732 | 0.070731972 | HM1->KO  |
| d_Bacteria;p_Firmicutes;c_Clostridia;o_Lachnospirales;f_Lachnospiraceae;g_[Ruminococcus]_torques_group                                 | -2.211960625 | 0.039284883 | 0.126039001 | HM2->KO  |
| d_Bacteria;p_Firmicutes;c_Clostridia;o_Lachnospirales;f_Lachnospiraceae;g_uncultured                                                   | -2.87333172  | 0.046183188 | 0.139338884 | HM1->KO  |
| d_Bacteria;p_Verrucomicrobiota;c_Verrucomicrobiae;o_Verrucomicrobiales;f_Akkermansiaceae;g_Akkermansia                                 | 2.162106428  | 0.047049493 | 0.139338884 | HM1->KO  |
| d_Bacteria;p_Actinobacteriota;c_Coriobacteriia;o_Coriobacteriales;f_Coriobacteriaceae;g_Collinsella                                    | -2.053617019 | 0.051198604 | 0.146010833 | HM2->KO  |
| d_Bacteria;p_Firmicutes;c_Clostridia;o_Oscillospirales;f_[Eubacterium]_coprostanoligenes_group;g_[Eubacterium]_coprostanoligenes_group | 2.024729773  | 0.055034767 | 0.147884295 | HM1->KO  |
| d_Bacteria;p_Firmicutes;c_Clostridia;o_Lachnospirales;f_Lachnospiraceae;g_Hungatella                                                   | 2.043281969  | 0.055696682 | 0.147884295 | HM1->KO  |
| d_Bacteria;p_Actinobacteriota;c_Coriobacteriia;o_Coriobacteriales;f_Eggerthellaceae;g_Gordonibacter                                    | -1.839002148 | 0.08015382  | 0.205728139 | HM2->KO  |
| d_Bacteria;p_Firmicutes;c_Clostridia;o_Lachnospirales;f_Lachnospiraceae;g_Agathobacter                                                 | -1.819699174 | 0.087098347 | 0.216341054 | HM2->KO  |
| d_Bacteria;p_Firmicutes;c_Clostridia;o_Oscillospirales;f_Oscillospiraceae;g_Colixdextrabacter                                          | -1.729349121 | 0.098488302 | 0.236987477 | HM2->KO  |
| d_Bacteria;p_Firmicutes;c_Clostridia;o_Oscillospirales;f_Ruminococcaceae;g_Paludicola                                                  | -1.659269314 | 0.110080716 | 0.256855005 | HM2->KO  |
| d_Bacteria;p_Firmicutes;c_Clostridia;o_Oscillospirales;f_Ruminococcaceae;g_uncultured                                                  | 1.574261347  | 0.128746442 | 0.291572824 | HM1->KO  |
| d_Bacteria;p_Firmicutes;c_Clostridia;o_Lachnospirales;f_Lachnospiraceae;g_Lachnospiraceae                                              | 1.502614561  | 0.1473003   | 0.32406066  | HM1->KO  |
| d_Bacteria;p_Firmicutes;c_Clostridia;o_Lachnospirales;f_Lachnospiraceae;g_Sellimonas                                                   | -1.477179344 | 0.159100682 | 0.340298681 | HM2->KO  |
| d_Bacteria;p_Firmicutes;c_Clostridia;o_Lachnospirales;f_Lachnospiraceae;g_[Eubacterium]_fissicatena_group                              | 1.466955106  | 0.164490455 | 0.342317975 | HM1->KO  |
| d_Bacteria;p_Firmicutes;c_Clostridia;o_Oscillospirales;f_Oscillospiraceae;g_UCG-005                                                    | 1.396045647  | 0.17548393  | 0.355585857 | HM1->KO  |
| d_Bacteria;p_Firmicutes;c_Clostridia;o_Lachnospirales;f_Lachnospiraceae;g_Blautia                                                      | -1.369527934 | 0.185884527 | 0.367002783 | HM2->KO  |
| d_Bacteria;p_Firmicutes;c_Clostridia;o_Monoglobales;f_Monoglobaceae;g_Monoglobus                                                       | -1.350744801 | 0.193417568 | 0.372328818 | HM2->KO  |
| d_Bacteria;p_Firmicutes;c_Clostridia;o_Lachnospirales;f_Lachnospiraceae;g_UCG-008                                                      | -1.325382297 | 0.20384263  | 0.382826402 | HM2->KO  |
| d_Bacteria;p_Firmicutes;c_Clostridia;o_Oscillospirales;f_[Clostridium]_methylpentosum_group;g_[Clostridium]_methylpentosum_group       | 1.219282986  | 0.234662247 | 0.430214119 | HM1->KO  |
| d_Bacteria;p_Firmicutes;c_Clostridia;o_Oscillospirales;f_Ruminococcaceae;g_Negativibacillus                                            | 1.069382956  | 0.296420825 | 0.522611967 | HM1->KO  |
| d_Bacteria;p_Proteobacteria;c_Gammaproteobacteria;o_Vibrionales;f_Vibrionaceae;g_Vibrio                                                | 1.064675611  | 0.29863541  | 0.522611967 | HM1->KO  |
| d_Bacteria;p_Firmicutes;c_Clostridia;o_Lachnospirales;f_Lachnospiraceae;g_Roseburia                                                    | 1            | 0.334281943 | 0.551863394 | HM1->KO  |
| d_Bacteria;p_Firmicutes;c_Clostridia;o_Clostridia_vadinBB60_group;f_Clostridia_vadinBB60_group;g_Clostridia_vadinBB60_group            | 1            | 0.334281943 | 0.551863394 | HM1->KO  |
| d_Bacteria;p_Firmicutes;c_Clostridia;o_Lachnospirales;f_Lachnospiraceae;g_Marvinbryantia                                               | -0.984753599 | 0.339523669 | 0.551863394 | HM2->KO  |
| d_Bacteria;p_Firmicutes;c_Clostridia;o_Lachnospirales;f_Lachnospiraceae;g_Lachnospiraceae_NK4A136_group                                | 0.963508718  | 0.34541735  | 0.551863394 | HM1->KO  |
| d_Bacteria; ; ; ; ;                                                                                                                    | -0.966990889 | 0.351185796 | 0.551863394 | HM2->KO  |
| d_Bacteria;p_Firmicutes;c_Clostridia;o_Oscillospirales;f_Ruminococcaceae;g_Anaerotruncus                                               | 0.906254736  | 0.374275676 | 0.576384541 | HM1->KO  |
| d_Bacteria;p_Bacteroidota;c_Bacteroidia;o_Bacteroidales;f_Rikenellaceae;g_Alistipes                                                    | -0.864746183 | 0.400222641 | 0.604257713 | HM2->KO  |
| d_Bacteria;p_Firmicutes;c_Clostridia;o_Peptococcales;f_Peptococcaceae;g_uncultured                                                     | -0.841442192 | 0.409222706 | 0.605964392 | HM2->KO  |
| d_Bacteria;p_Firmicutes;c_Clostridia;o_Oscillospirales;f_Ruminococcaceae;g_Incertae_Sedis                                              | 0.804593342  | 0.431754047 | 0.627263313 | HM1->KO  |
| d_Bacteria;p_Firmicutes;c_Clostridia;o_Oscillospirales;f_uncultured;g_uncultured                                                       | -0.780443252 | 0.449866516 | 0.641476328 | HM2->KO  |
| d_Bacteria;p_Firmicutes;c_Bacilli;o_Erysipelotrichales;f_Erysipelotrichaceae;g_[Clostridium]_innocuum_group                            | -0.742246601 | 0.46854053  | 0.644829222 | HM2->KO  |
| d_Bacteria;p_Actinobacteriota;c_Coriobacteriia;o_Coriobacteriales;f_Eggerthellaceae;                                                   | -0.740719761 | 0.468966707 | 0.644829222 | HM2->KO  |
| d_Bacteria;p_Firmicutes;c_Clostridia;o_Oscillospirales;f_Ruminococcaceae;g_Subdoligranulum                                             | 0.700012291  | 0.490907692 | 0.663156005 | HM1->KO  |
| d_Bacteria;p_Firmicutes;c_Clostridia;o_Lachnospirales;f_Lachnospiraceae;g_GCA-900066755                                                | 0.666059371  | 0.511993147 | 0.67971504  | HM1->KO  |
| d_Bacteria;p_Firmicutes;c_Bacilli;o_Erysipelotrichales;f_Erysipelotrichaceae;g_Turicibacter                                            | -0.633106475 | 0.535119186 | 0.698375887 | HM2->KO  |
| d_Bacteria;p_Firmicutes;c_Clostridia;o_Lachnospirales;f_Lachnospiraceae;g_Anaerostipes                                                 | 0.608866911  | 0.552139132 | 0.703269348 | HM1->KO  |
| d_Bacteria;p_Firmicutes;c_Bacilli;o_Erysipelotrichales;f_Erysipelotrichaceae;g_Dielma                                                  | 0.59034896   | 0.562644997 | 0.703269348 | HM1->KO  |
| d_Bacteria;p_Firmicutes;c_Clostridia;o_Lachnospirales;f_Lachnospiraceae;g_GCA-900066575                                                | 0.582673928  | 0.566268826 | 0.703269348 | HM1->KO  |
| d_Bacteria;p_Firmicutes;c_Clostridia;o_Lachnospirales;f_Lachnospiraceae;g_Lachnoclostridium                                            | -0.567306575 | 0.57583686  | 0.703800606 | HM2->KO  |
| d_Bacteria;p_Firmicutes;c_Clostridia;o_Peptostreptococcales-Tissierellales;f_Anaerovoracaceae;g_Family_XIII_AD3011_group               | 0.553722574  | 0.586721754 | 0.705896111 | HM1->KO  |
| d_Bacteria;p_Firmicutes;c_Bacilli;o_Staphylococcales;f_Staphylococcaceae;g_Staphylococcus                                              | -0.489944864 | 0.630196466 | 0.746540429 | HM2->KO  |
| d_Bacteria;p_Firmicutes;c_Clostridia;o_Oscillospirales;f_Ruminococcaceae;g_Faecalibacterium                                            | -0.46916379  | 0.644137535 | 0.74889516  | HM2->KO  |
| d_Bacteria;p_Proteobacteria;c_Gammaproteobacteria;o_Enterobacteriales;f_Enterobacteriaceae;g_Escherichia-Shigella                      | 0.457353246  | 0.651636049 | 0.74889516  | HM1->KO  |
| d_Bacteria;p_Actinobacteriota;c_Coriobacteriia;o_Coriobacteriales;f_Eggerthellaceae;g_Adlercreutzia                                    | -0.401153298 | 0.692283737 | 0.783909525 | HM2->KO  |
| d_Bacteria;p_Firmicutes;c_Clostridia;o_Oscillospirales;f_Butyricoccaceae;g_Butyricoccus                                                | 0.367034373  | 0.717066592 | 0.79399903  | HM1->KO  |
| d_Bacteria;p_Actinobacteriota;c_Actinobacteriia;o_Bifidobacteriales;f_Bifidobacteriaceae;g_Bifidobacterium                             | -0.34049406  | 0.736486169 | 0.79399903  | HM2->KO  |
| d_Bacteria;p_Firmicutes;c_Clostridia;o_Oscillospirales;f_Ruminococcaceae;g_Ruminococcus                                                | -0.338612796 | 0.73786616  | 0.79399903  | HM2->KO  |
| d_Bacteria;p_Firmicutes;c_Clostridia;o_Oscillospirales;f_Oscillospiraceae;g_Flavonifractor                                             | 0.332612266  | 0.742440651 | 0.79399903  | HM1->KO  |
| d_Bacteria;p_Firmicutes;c_Bacilli;o_Lactobacillales;f_Enterococcaceae;g_Enterococcus                                                   | 0.282297963  | 0.781292642 | 0.824103198 | HM1->KO  |
| d_Bacteria;p_Firmicutes;c_Clostridia;o_Peptostreptococcales-Tissierellales;f_Peptostreptococcaceae;g_Terrisporobacter                  | -0.245466845 | 0.80845691  | 0.832217349 | HM2->KO  |
| d_Bacteria;p_Firmicutes;c_Clostridia;o_Oscillospirales;f_Oscillospiraceae;g_uncultured                                                 | 0.242519985  | 0.810601314 | 0.832217349 | HM1->KO  |
| d_Bacteria;p_Firmicutes;c_Clostridia;o_Oscillospirales;f_Ruminococcaceae;g_Phocaea                                                     | -0.205150521 | 0.839295404 | 0.850338765 | HM2->KO  |
| d_Bacteria;p_Proteobacteria;c_Gammaproteobacteria;o_Burkholderiales;f_Sutterellaceae;g_Parasutterella                                  | -0.140368696 | 0.889590594 | 0.889590594 | HM2->KO  |

| Operational Taxonomic Unit (Genus) for HM1->KO vs IMM-g1->KO Comparison                                                                | T-value      | P-value     | FDR         | Enriched   |
|----------------------------------------------------------------------------------------------------------------------------------------|--------------|-------------|-------------|------------|
| d_Bacteria;p_Firmicutes;c_Clostridia;o_Peptostreptococcales-Tissierellales;f_Peptostreptococcaceae;g_Clostridioides                    | -3.856040953 | 0.00089122  | 0.03917372  | IMM-g1->KO |
| d_Bacteria;p_Firmicutes;c_Clostridia;o_Lachnospirales;f_Lachnospiraceae;g_Lactonifactor                                                | -3.686744698 | 0.001044633 | 0.03917372  | IMM-g1->KO |
| d_Bacteria;p_Firmicutes;c_Clostridia;o_Lachnospirales;f_Lachnospiraceae;g_Epulopiscium                                                 | 3.349822035  | 0.00213719  | 0.053429747 | HM1->KO    |
| d_Bacteria;p_Firmicutes;c_Clostridia;o_Lachnospirales;f_Lachnospiraceae;g_[Ruminococcus]_gnavus_group                                  | 2.8058424    | 0.009057392 | 0.169826099 | HM1->KO    |
| d_Bacteria;p_Bacteroidota;c_Bacteroidia;o_Bacteroidales;f_Rikenellaceae;g_Alistipes                                                    | -2.71838275  | 0.015717848 | 0.235767713 | IMM-g1->KO |
| d_Bacteria;p_Firmicutes;c_Clostridia;o_Oscillospirales;f_Oscillospiraceae;g_UCG-005                                                    | 2.41279103   | 0.024888774 | 0.247332915 | HM1->KO    |
| d_Bacteria;p_Firmicutes;c_Bacilli;o_Lactobacillales;f_Streptococcaceae;g_Streptococcus                                                 | 2.495832846  | 0.02543905  | 0.247332915 | HM1->KO    |
| d_Bacteria;p_Firmicutes;c_Clostridia;o_Oscillospirales;f_Ruminococcaceae;g_Ruminococcus                                                | 2.415175635  | 0.029506351 | 0.247332915 | HM1->KO    |
| d_Bacteria;p_Firmicutes;c_Clostridia;o_Peptococcales;f_Peptococcaceae;g_uncultured                                                     | 2.295103433  | 0.032188589 | 0.247332915 | HM1->KO    |
| d_Bacteria;p_Firmicutes;c_Clostridia;o_Oscillospirales;f_[Clostridium]_methylpentosum_group;g_[Clostridium]_methylpentosum_group       | -2.234909296 | 0.032977722 | 0.247332915 | IMM-g1->KO |
| d_Bacteria;p_Proteobacteria;c_Gammaproteobacteria;o_Vibrionales;f_Vibrionaceae;g_Vibrio                                                | 2.12133112   | 0.043517013 | 0.257871953 | HM1->KO    |
| d_Bacteria;p_Firmicutes;c_Clostridia;o_Lachnospirales;f_Lachnospiraceae;g_uncultured                                                   | 2.18733172   | 0.046183188 | 0.257871953 | HM1->KO    |
| d_Bacteria;p_Firmicutes;c_Clostridia;o_Lachnospirales;f_Lachnospiraceae;g_                                                             | 2.096382452  | 0.047768137 | 0.257871953 | HM1->KO    |
| d_Bacteria;p_Firmicutes;c_Clostridia;o_Clostridiales;f_Clostridiaceae;g_Clostridium_sensu_stricto_13                                   | -2.078827973 | 0.048136098 | 0.257871953 | IMM-g1->KO |
| d_Bacteria;p_Firmicutes;c_Clostridia;o_Oscillospirales;f_Ruminococcaceae;g_uncultured                                                  | 2.0392844    | 0.051884758 | 0.25942392  | HM1->KO    |
| d_Bacteria;p_Proteobacteria;c_Gammaproteobacteria;o_Enterobacteriales;f_Enterobacteriaceae;g_Escherichia-Shigella                      | -2.004925076 | 0.057984473 | 0.271802217 | IMM-g1->KO |
| d_Bacteria;p_Firmicutes;c_Bacilli;o_Erysipelotrichales;f_Erysipelotrichaceae;g_Turicibacter                                            | 1.912877331  | 0.074052439 | 0.326701937 | HM1->KO    |
| d_Bacteria;p_Firmicutes;c_Clostridia;o_Oscillospirales;f_Ruminococcaceae;g_Subdoligranulum                                             | 1.863142456  | 0.083554869 | 0.343067686 | HM1->KO    |
| d_Bacteria;p_Firmicutes;c_Clostridia;o_Oscillospirales;f_Ruminococcaceae;g_                                                            | 1.840993078  | 0.086910481 | 0.343067686 | HM1->KO    |
| d_Bacteria;p_Firmicutes;c_Clostridia;o_Oscillospirales;f_Ruminococcaceae;g_Faecalibacterium                                            | 1.668124266  | 0.116502524 | 0.436884464 | HM1->KO    |
| d_Bacteria;p_Firmicutes;c_Clostridia;o_Peptostreptococcales-Tissierellales;f_Peptostreptococcaceae;g_Romboutsia                        | -1.565815034 | 0.135815799 | 0.485056424 | IMM-g1->KO |
| d_Bacteria;p_Firmicutes;c_Bacilli;o_Staphylococcales;f_Staphylococcaceae;g_Staphylococcus                                              | 1.459459783  | 0.15919922  | 0.499727514 | HM1->KO    |
| d_Bacteria;p_                                                                                                                          | -1.433571826 | 0.163828866 | 0.499727514 | IMM-g1->KO |
| d_Bacteria;p_Firmicutes;c_uncultured;o_uncultured;f_uncultured;g_uncultured                                                            | 1.467462799  | 0.164354338 | 0.499727514 | HM1->KO    |
| d_Bacteria;p_Firmicutes;c_Clostridia;o_Lachnospirales;f_Lachnospiraceae;g_Marvinbryantia                                               | 1.459220545  | 0.166575838 | 0.499727514 | HM1->KO    |
| d_Bacteria;p_Firmicutes;c_Bacilli;o_Erysipelotrichales;f_Erysipelotrichaceae;g_Holdemania                                              | -1.346325213 | 0.189712286 | 0.530431814 | IMM-g1->KO |
| d_Bacteria;p_Firmicutes;c_Clostridia;o_Oscillospirales;f_Ruminococcaceae;g_Paludicola                                                  | 1.3398498    | 0.190955453 | 0.530431814 | HM1->KO    |
| d_Bacteria;p_Firmicutes;c_Clostridia;o_Oscillospirales;f_Oscillospiraceae;g_Colixtribacter                                             | 1.297912214  | 0.20802158  | 0.55720066  | HM1->KO    |
| d_Bacteria;p_Firmicutes;c_Clostridia;o_Clostridiales;f_Clostridiaceae;g_Clostridium_sensu_stricto_1                                    | -1.238615385 | 0.225586803 | 0.561116334 | IMM-g1->KO |
| d_Bacteria;p_Firmicutes;c_Clostridia;o_Oscillospirales;f_Oscillospiraceae;g_Oscillibacter                                              | 1.234320501  | 0.226359055 | 0.561116334 | HM1->KO    |
| d_Bacteria;p_Firmicutes;c_Bacilli;o_Lactobacillales;f_Enterococcaceae;g_Enterococcus                                                   | -1.204916202 | 0.239896047 | 0.561116334 | IMM-g1->KO |
| Unassigned; ; ; ; ;                                                                                                                    | 1.197899689  | 0.240301084 | 0.561116334 | HM1->KO    |
| d_Bacteria;p_Actinobacteriota;c_Coriobacterii;o_Coriobacteriales;f_Coriobacteriaceae;g_Collinsella                                     | 1.170917151  | 0.252524226 | 0.561116334 | HM1->KO    |
| d_Bacteria;p_Firmicutes;c_Clostridia;o_Lachnospirales;f_Lachnospiraceae;g_Blautia                                                      | 1.132584264  | 0.266269756 | 0.561116334 | HM1->KO    |
| d_Bacteria;p_Actinobacteriota;c_Coriobacterii;o_Coriobacteriales;f_Eggerthellaceae;g_Adlercreutzia                                     | 1.121524959  | 0.272226554 | 0.561116334 | HM1->KO    |
| d_Bacteria;p_Firmicutes;c_Clostridia;o_Oscillospirales;f_Ruminococcaceae;g_UBA1819                                                     | 1.107937942  | 0.276457817 | 0.561116334 | HM1->KO    |
| d_Bacteria;p_Firmicutes;c_Clostridia;o_Monoglobales;f_Monoglobaceae;g_Monoglobus                                                       | 1.10972619   | 0.276817392 | 0.561116334 | HM1->KO    |
| d_Bacteria;p_Bacteroidota;c_Bacteroidia;o_Bacteroidales;f_Tannerellaceae;g_Parabacteroides                                             | -1           | 0.331332762 | 0.583081486 | IMM-g1->KO |
| d_Bacteria;p_Firmicutes;c_Clostridia;o_Lachnospirales;f_Lachnospiraceae;g_Agathobacter                                                 | 1            | 0.334281943 | 0.583081486 | HM1->KO    |
| d_Bacteria;p_Firmicutes;c_Clostridia;o_Lachnospirales;f_Lachnospiraceae;g_Roseburia                                                    | 1            | 0.334281943 | 0.583081486 | HM1->KO    |
| d_Bacteria;p_Actinobacteriota;c_Coriobacterii;o_Coriobacteriales;f_Eggerthellaceae;g_                                                  | 1            | 0.334281943 | 0.583081486 | HM1->KO    |
| d_Bacteria;p_Firmicutes;c_Clostridia;o_Clostridia_vadinBB60_group;f_Clostridia_vadinBB60_group;g_Clostridia_vadinBB60_group            | 1            | 0.334281943 | 0.583081486 | HM1->KO    |
| d_Bacteria;p_Firmicutes;c_Clostridia;o_Peptostreptococcales-Tissierellales;f_Anaerovoracaceae;g_[Eubacterium]_nodatum_group            | -0.981186609 | 0.334300052 | 0.583081486 | IMM-g1->KO |
| d_Bacteria;p_Actinobacteriota;c_Coriobacterii;o_Coriobacteriales;f_Eggerthellaceae;g_Gordonibacter                                     | 0.960157989  | 0.344414235 | 0.587069719 | HM1->KO    |
| d_Bacteria;p_Firmicutes;c_Clostridia;o_Oscillospirales;f_Ruminococcaceae;g_Incertae_Sedis                                              | 0.89039153   | 0.384120226 | 0.63895558  | HM1->KO    |
| d_Bacteria;p_Firmicutes;c_Clostridia;o_Lachnospirales;f_Lachnospiraceae;g_GCA-900066575                                                | 0.868640425  | 0.391892891 | 0.63895558  | HM1->KO    |
| d_Bacteria;p_Firmicutes;c_Bacilli;o_Erysipelotrichales;f_Erysipelotrichaceae;g_[Clostridium]_innocuum_group                            | 0.824635642  | 0.417910413 | 0.666878318 | HM1->KO    |
| d_Bacteria;p_Firmicutes;c_Clostridia;o_Oscillospirales;f_Oscillospiraceae;g_Flavonifactor                                              | -0.801893401 | 0.428813778 | 0.670021528 | IMM-g1->KO |
| d_Bacteria;p_Firmicutes;c_Clostridia;o_Lachnospirales;f_Lachnospiraceae;g_Anaerostipes                                                 | 0.772055967  | 0.446438745 | 0.678917518 | HM1->KO    |
| d_Bacteria;p_Firmicutes;c_Clostridia;o_Lachnospirales;f_Lachnospiraceae;g_Lachnospiraceae                                              | -0.756452971 | 0.455091636 | 0.678917518 | IMM-g1->KO |
| d_Bacteria;p_Firmicutes;c_Clostridia;o_Lachnospirales;f_Lachnospiraceae;g_GCA-900066755                                                | -0.715234254 | 0.48028339  | 0.678917518 | IMM-g1->KO |
| d_Bacteria;p_Firmicutes;c_Clostridia;o_Lachnospirales;f_Lachnospiraceae;g_Sellimonas                                                   | -0.710072501 | 0.486101793 | 0.678917518 | IMM-g1->KO |
| d_Bacteria;p_Firmicutes;c_Clostridia;o_Oscillospirales;f_Ruminococcaceae;g_Anaerotruncus                                               | -0.696298354 | 0.491705112 | 0.678917518 | HM1->KO    |
| d_Bacteria;p_Firmicutes;c_Clostridia;o_Lachnospirales;f_Lachnospiraceae;g_[Eubacterium]_fissicatena_group                              | 0.691887651  | 0.495501591 | 0.678917518 | HM1->KO    |
| d_Bacteria;p_Verrucomicrobiota;c_Verrucomicrobiae;o_Verrucomicrobiales;f_Akkermansiaceae;g_Akkermansia                                 | -0.685908423 | 0.497872847 | 0.678917518 | IMM-g1->KO |
| d_Bacteria;p_Firmicutes;c_Clostridia;o_Oscillospirales;f_Oscillospiraceae;g_uncultured                                                 | 0.656303268  | 0.516658962 | 0.691953968 | HM1->KO    |
| d_Bacteria;p_Firmicutes;c_Clostridia;o_Peptostreptococcales-Tissierellales;f_Peptostreptococcaceae;g_Terrisporobacter                  | -0.581534204 | 0.565091832 | 0.743541884 | IMM-g1->KO |
| d_Bacteria;p_Firmicutes;c_Clostridia;o_Oscillospirales;f_[Eubacterium]_coprostanoligenes_group;g_[Eubacterium]_coprostanoligenes_group | -0.551821834 | 0.585311965 | 0.750118692 | IMM-g1->KO |
| d_Bacteria;p_Firmicutes;c_Clostridia;o_Lachnospirales;f_Lachnospiraceae;g_[Ruminococcus]_torques_group                                 | 0.531959872  | 0.598667293 | 0.750118692 | HM1->KO    |
| d_Bacteria;p_Firmicutes;c_Clostridia;o_Lachnospirales;f_Lachnospiraceae;g_Eisenbergiella                                               | 0.512590536  | 0.611999985 | 0.750118692 | HM1->KO    |
| d_Bacteria;p_Firmicutes;c_Clostridia;o_Lachnospirales;f_Lachnospiraceae;g_Hungatella                                                   | -0.51164699  | 0.613615223 | 0.750118692 | IMM-g1->KO |
| d_Bacteria;p_Proteobacteria;c_Gammaproteobacteria;o_Burkholderiales;f_Sutterellaceae;g_Parasutterella                                  | -0.497956441 | 0.622113434 | 0.750118692 | IMM-g1->KO |
| d_Bacteria;p_Firmicutes;c_Clostridia;o_Lachnospirales;f_Lachnospiraceae;g_Lachnospiraceae_UCG-008                                      | 0.486821294  | 0.630099701 | 0.750118692 | HM1->KO    |
| d_Bacteria;p_Firmicutes;c_Clostridia;o_Oscillospirales;f_Ruminococcaceae;g_Negativibacillus                                            | 0.471068794  | 0.641004997 | 0.751177731 | HM1->KO    |
| d_Bacteria;p_Actinobacteriota;c_Coriobacterii;o_Coriobacteriales;f_Eggerthellaceae;g_Eggerthella                                       | 0.410292429  | 0.684708299 | 0.790048031 | HM1->KO    |
| d_Bacteria;p_Firmicutes;c_Clostridia;o_Oscillospirales;f_Ruminococcaceae;g_Candidatus_Soleiferrea                                      | -0.379858862 | 0.706709436 | 0.803078905 | IMM-g1->KO |
| d_Bacteria;p_Actinobacteriota;c_Actinobacteria;o_Bifidobacteriales;f_Bifidobacteriaceae;g_Bifidobacterium                              | -0.324069667 | 0.748403481 | 0.83776509  | IMM-g1->KO |
| d_Bacteria;p_Firmicutes;c_Clostridia;o_Lachnospirales;f_Lachnospiraceae;g_Lachnospiraceae_NK4A136_group                                | 0.275979662  | 0.784557567 | 0.865320846 | HM1->KO    |
| d_Bacteria;p_Bacteroidota;c_Bacteroidia;o_Bacteroidales;f_Bacteroidaceae;g_Bacteroides                                                 | -0.183268014 | 0.855826342 | 0.930246024 | IMM-g1->KO |
| d_Bacteria;p_Firmicutes;c_Bacilli;o_Erysipelotrichales;f_Erysipelotrichaceae;g_Erysipelotrichaceae                                     | 0.104038163  | 0.917857235 | 0.969016661 | HM1->KO    |
| d_Bacteria;p_Firmicutes;c_Clostridia;o_Oscillospirales;f_Ruminococcaceae;g_Phocea                                                      | -0.102947512 | 0.918775047 | 0.969016661 | IMM-g1->KO |
| d_Bacteria;p_Firmicutes;c_Bacilli;o_Erysipelotrichales;f_Erysipelotrichaceae;g_Dielma                                                  | 0.085214168  | 0.932742771 | 0.969016661 | HM1->KO    |
| d_Bacteria;p_Firmicutes;c_Clostridia;o_Oscillospirales;f_Butyricoccaceae;g_Butyricoccus                                                | -0.071948258 | 0.943176217 | 0.969016661 | IMM-g1->KO |
| d_Bacteria;p_Firmicutes;c_Clostridia;o_Peptostreptococcales-Tissierellales;f_Anaerovoracaceae;g_Family_XIII_AD3011_group               | -0.032997316 | 0.973906877 | 0.984360086 | IMM-g1->KO |
| d_Bacteria;p_Firmicutes;c_Clostridia;o_Lachnospirales;f_Lachnospiraceae;g_Lachnoclostridium                                            | 0.019761961  | 0.984360086 | 0.984360086 | HM1->KO    |



| Operational Taxonomic Unit (Genus) for IMM-g1->KO vs NIMM-g1->KO Comparison                                                            | T-value      | P-value     | FDR         | Enriched    |
|----------------------------------------------------------------------------------------------------------------------------------------|--------------|-------------|-------------|-------------|
| d_Bacteria;p_Firmicutes;c_Clostridia;o_Lachnospirales;f_Lachnospiraceae;_                                                              | -9.259623812 | 3.64E-09    | 2.51E-07    | NIMM-g1->KO |
| d_Bacteria;p_Firmicutes;c_Clostridia;o_Lachnospirales;f_Lachnospiraceae;g_Lactonifactor                                                | 10.34935696  | 9.34E-09    | 3.22E-07    | IMM-g1->KO  |
| d_Bacteria;p_Proteobacteria;c_Gammaproteobacteria;o_Enterobacteriales;f_Enterobacteriaceae;g_Escherichia-Shigella                      | 8.962358466  | 1.09E-06    | 2.52E-05    | IMM-g1->KO  |
| d_Bacteria;p_Firmicutes;c_Clostridia;o_Clostridiales;f_Clostridiaceae;g_Clostridium_sensu_stricto_13                                   | 7.95976078   | 1.50E-06    | 2.59E-05    | IMM-g1->KO  |
| d_Bacteria;p_Firmicutes;c_Bacilli;o_Erysipelotrichales;f_Erysipelotrichaceae;g_[Clostridium]_innocuum_group                            | -5.584566259 | 1.56E-05    | 0.00021484  | NIMM-g1->KO |
| d_Bacteria;p_Firmicutes;c_Clostridia;o_Lachnospirales;f_Lachnospiraceae;g_GCA-900066575                                                | -5.480629775 | 2.82E-05    | 0.000324568 | NIMM-g1->KO |
| d_Bacteria;p_Actinobacteriota;c_Coriobacteriia;o_Coriobacteriales;f_Eggerthellaceae;g_Gordonibacter                                    | -4.886326205 | 6.97E-05    | 0.000686563 | NIMM-g1->KO |
| d_Bacteria;p_Firmicutes;c_Clostridia;o_Lachnospirales;f_Lachnospiraceae;g_Lachnoclostridium                                            | -4.419148454 | 0.000207034 | 0.001785671 | NIMM-g1->KO |
| d_Bacteria;p_Firmicutes;c_Clostridia;o_Lachnospirales;f_Lachnospiraceae;g_[Ruminococcus]_torques_group                                 | -4.798140769 | 0.000266507 | 0.002043224 | NIMM-g1->KO |
| d_Bacteria;p_Firmicutes;c_Clostridia;o_Oscillospirales;f_[Eubacterium]_coprostanoligenes_group;g_[Eubacterium]_coprostanoligenes_group | 4.436407564  | 0.000361803 | 0.002496442 | IMM-g1->KO  |
| d_Bacteria;p_Bacteroidota;c_Bacteroidia;o_Bacteroidales;f_Tannerellaceae;g_Parabacteroides                                             | -5.769982356 | 0.00056108  | 0.003251283 | NIMM-g1->KO |
| d_Bacteria;p_Firmicutes;c_Clostridia;o_Monoglobales;f_Monoglobaceae;g_Monoglobus                                                       | -4.105826006 | 0.000588822 | 0.003251283 | NIMM-g1->KO |
| d_Bacteria;p_Firmicutes;c_Clostridia;o_Oscillospirales;f_Ruminococcaceae;g_UBA1819                                                     | -4.007035018 | 0.000612561 | 0.003251283 | NIMM-g1->KO |
| d_Bacteria;p_Firmicutes;c_Clostridia;o_Lachnospirales;f_Lachnospiraceae;g_Anaerostipes                                                 | -4.154617217 | 0.000714635 | 0.003522128 | NIMM-g1->KO |
| d_Bacteria;p_Firmicutes;c_Clostridia;o_Oscillospirales;f_Ruminococcaceae;g_Negativibacillus                                            | 3.982815193  | 0.000962385 | 0.004426971 | IMM-g1->KO  |
| d_Bacteria;p_Firmicutes;c_Clostridia;o_Lachnospirales;f_Lachnospiraceae;g_[Eubacterium]_fissicatena_group                              | -4.853582686 | 0.00113223  | 0.004882742 | NIMM-g1->KO |
| d_Bacteria;p_Firmicutes;c_Clostridia;o_Oscillospirales;f_Oscillospiraceae;g_UCG-005                                                    | -4.549822677 | 0.002019342 | 0.008196153 | NIMM-g1->KO |
| d_Bacteria;p_Firmicutes;c_Clostridia;o_Peptostreptococcales-Tissierellales;f_Peptostreptococcaceae;g_Terrisporobacter                  | 3.583072925  | 0.002291561 | 0.008784315 | IMM-g1->KO  |
| d_Bacteria;p_Firmicutes;c_Clostridia;o_Oscillospirales;f_Oscillospiraceae;g_Colidextribacter                                           | -3.302578334 | 0.003286828 | 0.014717175 | NIMM-g1->KO |
| d_Bacteria;p_Firmicutes;c_Clostridia;o_Oscillospirales;f_Ruminococcaceae;g_Paludicola                                                  | -3.668368015 | 0.003325152 | 0.014717175 | NIMM-g1->KO |
| d_Bacteria;p_Proteobacteria;c_Gammaproteobacteria;o_Burkholderiales;f_Sutterellaceae;g_Parasutterella                                  | 3.279859474  | 0.004418018 | 0.01413377  | IMM-g1->KO  |
| d_Bacteria;p_Firmicutes;c_Clostridia;o_Lachnospirales;f_Lachnospiraceae;g_Blaugia                                                      | -3.143208659 | 0.004664629 | 0.01413377  | NIMM-g1->KO |
| d_Bacteria;p_Firmicutes;c_Clostridia;o_Oscillospirales;f_[Clostridium]_methylpentosum_group;g_[Clostridium]_methylpentosum_group       | 3.340531384  | 0.004711257 | 0.01413377  | IMM-g1->KO  |
| d_Bacteria;p_Actinobacteriota;c_Actinobacteria;o_Bifidobacteriales;f_Bifidobacteriaceae;g_Bifidobacterium                              | 3.009219717  | 0.006295862 | 0.018100604 | IMM-g1->KO  |
| d_Bacteria;p_Firmicutes;c_Clostridia;o_Lachnospirales;f_Lachnospiraceae;g_Epulisium                                                    | 2.973947901  | 0.008514394 | 0.023499727 | IMM-g1->KO  |
| d_Bacteria;p_Firmicutes;c_Clostridia;o_Lachnospirales;f_Lachnospiraceae;g_Lachnospiraceae                                              | -2.875306401 | 0.013403759 | 0.03376681  | NIMM-g1->KO |
| d_Bacteria;p_Firmicutes;c_Bacilli;o_Erysipelotrichales;f_Erysipelotrichaceae;g_Dielma                                                  | -2.712784197 | 0.013487139 | 0.03376681  | NIMM-g1->KO |
| d_Bacteria;p_Actinobacteriota;c_Coriobacteriia;o_Coriobacteriales;f_Eggerthellaceae;g_Eggerthella                                      | -2.673055957 | 0.013702474 | 0.03376681  | NIMM-g1->KO |
| d_Bacteria;p_Actinobacteriota;c_Coriobacteriia;o_Coriobacteriales;f_Eggerthellaceae;g_Adlercreutzia                                    | -2.678754809 | 0.027129443 | 0.064549365 | NIMM-g1->KO |
| d_Bacteria;p_Firmicutes;c_Clostridia;o_Oscillospirales;f_Oscillospiraceae;g_uncultured                                                 | -2.279698609 | 0.033237763 | 0.075452355 | NIMM-g1->KO |
| d_Bacteria;p_Firmicutes;c_Clostridia;o_Oscillospirales;f_Oscillospiraceae;g_Flavonifractor                                             | -2.256124314 | 0.033898884 | 0.075452355 | NIMM-g1->KO |
| d_Bacteria;p_Firmicutes;c_Clostridia;o_Oscillospirales;f_Ruminococcaceae;g_Anaerotruncus                                               | -2.28868696  | 0.035517805 | 0.076444737 | NIMM-g1->KO |
| d_Bacteria;p_Verrucomicrobiota;c_Verrucomicrobiae;o_Verrucomicrobiales;f_Akkermansiaceae;g_Akkermansia                                 | -2.23860747  | 0.036560526 | 0.076444737 | NIMM-g1->KO |
| d_Bacteria;p_Firmicutes;c_Bacilli;o_Lactobacillales;f_Enterococcaceae;g_Enterococcus                                                   | 2.405076659  | 0.03768028  | 0.076468803 | IMM-g1->KO  |
| d_Bacteria;p_Firmicutes;c_Clostridia;o_Oscillospirales;f_Ruminococcaceae;g_uncultured                                                  | 2.435762134  | 0.039254703 | 0.077387844 | NIMM-g1->KO |
| d_Bacteria;p_Firmicutes;c_Clostridia;o_Oscillospirales;f_Oscillospiraceae;g_uncultured                                                 | 2.157570254  | 0.045561675 | 0.087326544 | IMM-g1->KO  |
| d_Bacteria;p_Firmicutes;c_Clostridia;o_Clostridiales;f_Clostridiaceae;g_Clostridium_sensu_stricto_1                                    | 2.258441239  | 0.059863022 | 0.111636446 | IMM-g1->KO  |
| d_Bacteria;p_Firmicutes;c_Clostridia;o_Lachnospirales;f_Lachnospiraceae;g_Eisenbergiella                                               | -1.924129325 | 0.067126149 | 0.121886955 | NIMM-g1->KO |
| d_Bacteria;p_Firmicutes;c_Clostridia;o_Lachnospirales;f_Lachnospiraceae;g_[Ruminococcus]_gnavus_group                                  | -1.882062701 | 0.075443177 | 0.13347639  | NIMM-g1->KO |
| d_Bacteria;p_Actinobacteriota;c_Coriobacteriia;o_Coriobacteriales;f_Coriobacteriaceae;g_Collinsella                                    | -1.738527978 | 0.095835182 | 0.165315689 | NIMM-g1->KO |
| d_Bacteria;p_Firmicutes;c_Clostridia;o_Peptostreptococcales-Tissierellales;f_Peptostreptococcaceae;g_Romboutsia                        | 1.565815034  | 0.135815799 | 0.221848209 | IMM-g1->KO  |
| d_Bacteria;p_Firmicutes;c_Clostridia;o_Lachnospirales;f_Lachnospiraceae;g_Lachnospiraceae_NK4A136_group                                | -1.625334703 | 0.137285691 | 0.221848209 | NIMM-g1->KO |
| d_Bacteria;p_Proteobacteria;c_Gammaproteobacteria;o_Vibrionales;f_Vibrionaceae;g_Vibrio                                                | 1.552994099  | 0.138253232 | 0.221848209 | IMM-g1->KO  |
| d_Bacteria;p_Firmicutes;c_Bacilli;o_Erysipelotrichales;f_Erysipelotrichaceae;g_Holdemania                                              | -1.561865468 | 0.148269884 | 0.232514136 | NIMM-g1->KO |
| d_Bacteria;p_Firmicutes;c_Clostridia;o_Lachnospirales;f_Lachnospiraceae;g_Lachnospiraceae_UCG-008                                      | -1.526158281 | 0.163969609 | 0.24929489  | NIMM-g1->KO |
| d_Bacteria;p_Firmicutes;c_Clostridia;o_Peptococcales;f_Peptococcaceae;g_uncultured                                                     | 1.443422083  | 0.167076745 | 0.24929489  | IMM-g1->KO  |
| Unassigned;_                                                                                                                           | -1.415163697 | 0.170418489 | 0.24929489  | NIMM-g1->KO |
| d_Bacteria;p_Firmicutes;c_Bacilli;o_Erysipelotrichales;f_Erysipelotrichaceae;g_Erysipelotrichaceae                                     | -1.474632177 | 0.174640448 | 0.24929489  | NIMM-g1->KO |
| d_Bacteria;p_Bacteroidota;c_Bacteroidia;o_Bacteroidales;f_Bacteroidaceae;g_Bacteroides                                                 | 1.418952189  | 0.177035502 | 0.24929489  | IMM-g1->KO  |
| d_Bacteria;p_Firmicutes;c_Clostridia;o_Peptostreptococcales-Tissierellales;f_Peptostreptococcaceae;g_Clostridioides                    | 1.277417102  | 0.243537011 | 0.336081075 | IMM-g1->KO  |
| d_Bacteria;p_Firmicutes;c_Clostridia;o_Oscillospirales;f_Ruminococcaceae;g_Faecalibacterium                                            | 1            | 0.331332762 | 0.416242715 | IMM-g1->KO  |
| d_Bacteria;p_Firmicutes;c_Bacilli;o_Erysipelotrichales;f_Erysipelotrichaceae;g_Turicibacter                                            | 1            | 0.331332762 | 0.416242715 | IMM-g1->KO  |
| d_Bacteria;p_Firmicutes;c_Clostridia;o_Oscillospirales;f_Ruminococcaceae;g_Ruminococcus                                                | 1            | 0.331332762 | 0.416242715 | IMM-g1->KO  |
| d_Bacteria;p_Firmicutes;c_Bacilli;o_Lactobacillales;f_Streptococcaceae;g_Streptococcus                                                 | 1            | 0.331332762 | 0.416242715 | IMM-g1->KO  |
| d_Bacteria;p_Firmicutes;c_Clostridia;o_Lachnospirales;f_Lachnospiraceae;g_Hungatella                                                   | -1.010987234 | 0.336855455 | 0.416242715 | NIMM-g1->KO |
| d_Bacteria;p_Firmicutes;c_Clostridia;o_Lachnospirales;f_Lachnospiraceae;g_GCA-900066755                                                | -0.962798357 | 0.35385772  | 0.416242715 | NIMM-g1->KO |
| d_Bacteria;p_Firmicutes;c_Clostridia;o_Lachnospirales;f_Lachnospiraceae;g_Agathobacter                                                 | -1           | 0.355917684 | 0.416242715 | NIMM-g1->KO |
| d_Bacteria;p_Firmicutes;c_Clostridia;o_Oscillospirales;f_Ruminococcaceae;g_DTU089                                                      | -1           | 0.355917684 | 0.416242715 | NIMM-g1->KO |
| d_Bacteria;p_Actinobacteriota;c_Coriobacteriia;o_Coriobacteriales;f_Eggerthellaceae;_                                                  | -1           | 0.355917684 | 0.416242715 | NIMM-g1->KO |
| d_Bacteria;p_Firmicutes;c_Clostridia;o_Oscillospirales;f_Oscillospiraceae;g_Oscillibacter                                              | -0.916456157 | 0.377129376 | 0.433698782 | NIMM-g1->KO |
| d_Bacteria;p_Firmicutes;c_Clostridia;o_Oscillospirales;f_Butyricicoccaceae;g_Butyricoccus                                              | -0.773590318 | 0.448291594 | 0.507083934 | NIMM-g1->KO |
| d_Bacteria;p_Firmicutes;c_Clostridia;o_Peptostreptococcales-Tissierellales;f_Anaerovoracaceae;g_[Eubacterium]_nodatum_group            | -0.776837693 | 0.456165858 | 0.507668455 | NIMM-g1->KO |
| d_Bacteria;p_Bacteroidota;c_Bacteroidia;o_Bacteroidales;f_Rikenellaceae;g_Alistipes                                                    | 0.566996645  | 0.577298706 | 0.632279535 | IMM-g1->KO  |
| d_Bacteria;p_Firmicutes;c_Clostridia;o_Oscillospirales;f_Ruminococcaceae;g_Incertae_Sedis                                              | 0.522997364  | 0.6178284   | 0.666096244 | IMM-g1->KO  |
| d_Bacteria;p_Firmicutes;c_Clostridia;o_Peptostreptococcales-Tissierellales;f_Anaerovoracaceae;g_Family_XIII_AD3011_group               | -0.489729471 | 0.631971287 | 0.670861828 | NIMM-g1->KO |
| d_Bacteria;p_Firmicutes;c_Bacilli;o_Staphylococcales;f_Staphylococcaceae;g_Staphylococcus                                              | -0.415177608 | 0.687157852 | 0.7183923   | NIMM-g1->KO |
| d_Bacteria;p_Firmicutes;c_Clostridia;o_Oscillospirales;f_Ruminococcaceae;g_Phocea                                                      | 0.346109708  | 0.736972828 | 0.758972017 | NIMM-g1->KO |
| d_Bacteria;p_Firmicutes;c_Clostridia;o_Lachnospirales;f_Lachnospiraceae;g_Sellimonas                                                   | -0.331236364 | 0.748401633 | 0.759407539 | NIMM-g1->KO |
| d_Bacteria;p_Firmicutes;c_Clostridia;o_Oscillospirales;f_Ruminococcaceae;g_Candidatus_Soleiferrea                                      | 0.019708413  | 0.984649104 | 0.984649104 | IMM-g1->KO  |

| Operational Taxonomic Unit (Genus) for IMM-g1->KO vs NIMM-g1->WT Comparison                                                            | T-value    | P-value    | FDR        | Enriched    |
|----------------------------------------------------------------------------------------------------------------------------------------|------------|------------|------------|-------------|
| d_Bacteria;p_Firmicutes;c_Clostridia;o_Lachnospirales;f_Lachnospiraceae;g_Lachnospiraceae_UCG-008                                      | -10.622979 | 3.30E-12   | 1.20E-10   | NIMM-g1->WT |
| d_Bacteria;p_Firmicutes;c_Clostridia;o_Lachnospirales;f_Lachnospiraceae;g_[Eubacterium]_fissicatena_group                              | -10.496807 | 3.43E-12   | 1.20E-10   | NIMM-g1->WT |
| d_Bacteria;p_Firmicutes;c_Clostridia;o_Clostridiales;f_Clostridiaceae;g_Clostridium_sensu_stricto_13                                   | 9.80382396 | 3.05E-11   | 7.11E-10   | IMM-g1->KO  |
| d_Bacteria;p_Proteobacteria;c_Gammaproteobacteria;o_Enterobacteriales;f_Enterobacteriaceae;g_Escherichia-Shigella                      | 8.84514842 | 3.52E-10   | 6.16E-09   | IMM-g1->KO  |
| d_Bacteria;p_Firmicutes;c_Clostridia;o_Clostridiales;f_Clostridiaceae;g_Clostridium_sensu_stricto_1                                    | 9.16653359 | 1.39E-09   | 1.95E-08   | IMM-g1->KO  |
| d_Bacteria;p_Bacteroidota;c_Bacteroidia;o_Bacteroidales;f_Tannerellaceae;g_Parabacteroides                                             | -8.8426351 | 3.28E-09   | 3.82E-08   | NIMM-g1->WT |
| d_Bacteria;p_Firmicutes;c_Clostridia;o_Lachnospirales;f_Lachnospiraceae;g_[Ruminococcus]_gnavus_group                                  | 7.68212631 | 6.29E-09   | 6.29E-08   | IMM-g1->KO  |
| d_Bacteria;p_Firmicutes;c_Clostridia;o_Lachnospirales;f_Lachnospiraceae;g_Lactonifactor                                                | 10.349357  | 9.34E-09   | 8.17E-08   | IMM-g1->KO  |
| d_Bacteria;p_Firmicutes;c_Clostridia;o_Lachnospirales;f_Lachnospiraceae;g_                                                             | -7.2656175 | 2.74E-08   | 2.13E-07   | NIMM-g1->WT |
| d_Bacteria;p_Firmicutes;c_Clostridia;o_Lachnospirales;f_Lachnospiraceae;g_[Ruminococcus]_torques_group                                 | -7.1152672 | 3.21E-08   | 2.24E-07   | NIMM-g1->WT |
| d_Bacteria;p_Firmicutes;c_Clostridia;o_Lachnospirales;f_Lachnospiraceae;g_Lachnospiraceae_NK4A136_group                                | -7.0472329 | 3.91E-08   | 2.49E-07   | NIMM-g1->WT |
| d_Bacteria;p_Firmicutes;c_Clostridia;o_Oscillospirales;f_Oscillospiraceae;g_UCG-005                                                    | -7.4736582 | 6.33E-08   | 3.69E-07   | NIMM-g1->WT |
| d_Bacteria;p_Firmicutes;c_Clostridia;o_Lachnospirales;f_Lachnospiraceae;g_Lachnospiraceae                                              | -5.7018746 | 2.11E-06   | 1.14E-05   | NIMM-g1->WT |
| d_Bacteria;p_Firmicutes;c_Clostridia;o_Oscillospirales;f_[Clostridium]_methylpentosum_group;g_[Clostridium]_methylpentosum_group       | 6.52211668 | 5.22E-06   | 2.61E-05   | IMM-g1->KO  |
| d_Bacteria;p_Firmicutes;c_Clostridia;o_Monoglobales;f_Monoglobaceae;g_Monoglobus                                                       | -5.6144412 | 7.09E-06   | 3.31E-05   | NIMM-g1->WT |
| d_Bacteria;p_Actinobacteriota;c_Coriobacteriia;o_Coriobacteriales;f_Eggerthellaceae;g_Gordonibacter                                    | -5.2161289 | 1.19E-05   | 5.19E-05   | NIMM-g1->WT |
| d_Bacteria;p_Firmicutes;c_Clostridia;o_Lachnospirales;f_Lachnospiraceae;g_Blautia                                                      | -4.970322  | 2.61E-05   | 0.0001076  | NIMM-g1->WT |
| d_Bacteria;p_Firmicutes;c_Clostridia;o_Lachnospirales;f_Lachnospiraceae;g_Anaerostipes                                                 | -5.2687516 | 3.20E-05   | 0.00012436 | NIMM-g1->WT |
| d_Bacteria;p_Firmicutes;c_Clostridia;o_Lachnospirales;f_Lachnospiraceae;g_Lachnoclostridium                                            | -4.6894869 | 4.49E-05   | 0.00016532 | NIMM-g1->WT |
| d_Bacteria;p_Firmicutes;c_Clostridia;o_Oscillospirales;f_Ruminococcaceae;g_Incertae_Sedis                                              | -4.4849006 | 8.34E-05   | 0.00029203 | NIMM-g1->WT |
| d_Bacteria;p_Firmicutes;c_Clostridia;o_Oscillospirales;f_Ruminococcaceae;g_UBA1819                                                     | -4.3782033 | 0.00011279 | 0.00037065 | NIMM-g1->WT |
| d_Bacteria;p_Firmicutes;c_Bacilli;o_Erysipelotrichales;f_Erysipelotrichaceae;g_Dielma                                                  | -4.3782033 | 0.00011649 | 0.00037065 | NIMM-g1->WT |
| d_Bacteria;p_Firmicutes;c_Clostridia;o_Lachnospirales;f_Lachnospiraceae;g_GCA-900066575                                                | -4.2099113 | 0.00017773 | 0.00054093 | NIMM-g1->WT |
| d_Bacteria;p_Firmicutes;c_Clostridia;o_Oscillospirales;f_Ruminococcaceae;g_uncultured                                                  | -4.1846877 | 0.0002568  | 0.00074901 | NIMM-g1->WT |
| d_Bacteria;p_Firmicutes;c_Clostridia;o_Oscillospirales;f_Ruminococcaceae;g_Paludicola                                                  | -3.7970765 | 0.00057855 | 0.00161993 | NIMM-g1->WT |
| d_Bacteria;p_Firmicutes;c_Clostridia;o_Oscillospirales;f_Oscillospiraceae;g_Colidextribacter                                           | -3.7150317 | 0.00076959 | 0.00207197 | NIMM-g1->WT |
| d_Bacteria;p_Firmicutes;c_Clostridia;o_Oscillospirales;f_Ruminococcaceae;g_Negativibacillus                                            | 3.98281519 | 0.00096239 | 0.00249507 | IMM-g1->KO  |
| d_Bacteria;p_Firmicutes;c_Clostridia;o_Oscillospirales;f_Oscillospiraceae;g_uncultured                                                 | -3.6131424 | 0.00134621 | 0.00336553 | NIMM-g1->WT |
| d_Bacteria;p_Actinobacteriota;c_Coriobacteriia;o_Coriobacteriales;f_Eggerthellaceae;g_Adlercreutzia                                    | -3.5159124 | 0.00154775 | 0.00373596 | NIMM-g1->WT |
| d_Bacteria;p_Firmicutes;c_Bacilli;o_Lactobacillales;f_Enterococcaceae;g_Enterococcus                                                   | 3.36074582 | 0.00200746 | 0.00468408 | IMM-g1->KO  |
| d_Bacteria;p_Firmicutes;c_Clostridia;o_Peptostreptococcales-Tissierellales;f_Peptostreptococcaceae;g_Terrisporobacter                  | 3.58307293 | 0.00229156 | 0.00506356 | IMM-g1->KO  |
| d_Bacteria;p_Firmicutes;c_Clostridia;o_Oscillospirales;f_Ruminococcaceae;g_                                                            | -3.5784293 | 0.00231477 | 0.00506356 | NIMM-g1->WT |
| d_Bacteria;p_Firmicutes;c_Clostridia;o_Lachnospirales;f_Lachnospiraceae;g_GCA-900066755                                                | -2.9600009 | 0.00563095 | 0.01194445 | NIMM-g1->WT |
| d_Bacteria;p_Firmicutes;c_Bacilli;o_Erysipelotrichales;f_Erysipelotrichaceae;g_[Clostridium]_innocuum_group                            | -2.9372395 | 0.00720693 | 0.01443456 | NIMM-g1->WT |
| Unassigned; ; ; ; ; ;                                                                                                                  | -2.8984143 | 0.00721728 | 0.01443456 | NIMM-g1->WT |
| d_Bacteria;p_Firmicutes;c_Bacilli;o_Staphylococcales;f_Staphylococcaceae;g_Staphylococcus                                              | -2.8349148 | 0.00972336 | 0.01890654 | NIMM-g1->WT |
| d_Bacteria;p_Firmicutes;c_Clostridia;o_Oscillospirales;f_Oscillospiraceae;g_Flavonifractor                                             | -2.7233817 | 0.01104222 | 0.02089068 | NIMM-g1->WT |
| d_Bacteria;p_Firmicutes;c_Clostridia;o_Lachnospirales;f_Lachnospiraceae;g_Sellimonas                                                   | -2.6506861 | 0.01240324 | 0.02284807 | NIMM-g1->WT |
| d_Bacteria;p_Actinobacteriota;c_Actinobacteriia;o_Bifidobacteriales;f_Bifidobacteriaceae;g_Bifidobacterium                             | 2.560816   | 0.01515593 | 0.02720296 | IMM-g1->KO  |
| d_Bacteria;p_Firmicutes;c_Clostridia;o_Clostridia_vadinBB60_group;f_Clostridia_vadinBB60_group;g_Clostridia_vadinBB60_group            | -2.5134119 | 0.02232601 | 0.03907051 | NIMM-g1->WT |
| d_Bacteria;p_Proteobacteria;c_Gammaproteobacteria;o_Burkholderiales;f_Sutterellaceae;g_Sutterella                                      | 2.33179872 | 0.0218178  | 0.04983282 | IMM-g1->KO  |
| d_Bacteria;p_Firmicutes;c_Clostridia;o_Lachnospirales;f_Lachnospiraceae;g_Epulosium                                                    | 2.16163136 | 0.04184777 | 0.06974629 | IMM-g1->KO  |
| d_Bacteria;p_Verrucomicrobiota;c_Verrucomicrobiae;o_Verrucomicrobiales;f_Akkermansiaceae;g_Akkermansia                                 | -2.0211687 | 0.05276367 | 0.08589434 | NIMM-g1->WT |
| d_Bacteria;p_Firmicutes;c_Clostridia;o_Peptostreptococcales-Tissierellales;f_Anaerovoracaceae;g_[Eubacterium]_nodatum_group            | -1.9807615 | 0.05931652 | 0.09256662 | NIMM-g1->WT |
| d_Bacteria;p_Firmicutes;c_Clostridia;o_Peptostreptococcales-Tissierellales;f_Peptostreptococcaceae;g_Clostridioides                    | 1.94641402 | 0.05995068 | 0.09325662 | IMM-g1->KO  |
| d_Bacteria;p_Firmicutes;c_Clostridia;o_Lachnospirales;f_Lachnospiraceae;g_Hungatella                                                   | 1.93168726 | 0.06177156 | 0.0940002  | IMM-g1->KO  |
| d_Bacteria;p_Actinobacteriota;c_Coriobacteriia;o_Coriobacteriales;f_Eggerthellaceae;g_Eggerthella                                      | -1.8933582 | 0.06687929 | 0.09960745 | NIMM-g1->WT |
| d_Bacteria;p_Firmicutes;c_Clostridia;o_Oscillospirales;f_Ruminococcaceae;g_Phocea                                                      | 1.76456316 | 0.08663238 | 0.12633889 | IMM-g1->KO  |
| d_Bacteria;p_Bacteroidota;c_Bacteroidia;o_Bacteroidales;f_Muribaculaceae;g_Muribaculaceae                                              | -1.7949105 | 0.09046804 | 0.12924006 | NIMM-g1->WT |
| d_Bacteria;p_Firmicutes;c_Clostridia;o_Oscillospirales;f_Ruminococcaceae;g_Candidatus_Soleaferrea                                      | -1.6888999 | 0.10091471 | 0.14128059 | NIMM-g1->WT |
| d_Bacteria;p_Firmicutes;c_Clostridia;o_Oscillospirales;f_Ruminococcaceae;g_Faecalibacterium                                            | -1.6356599 | 0.1155753  | 0.15863276 | NIMM-g1->WT |
| d_Bacteria;p_Firmicutes;c_Clostridia;o_Peptostreptococcales-Tissierellales;f_Peptostreptococcaceae;g_Romboutsia                        | 1.56581503 | 0.1358158  | 0.18282896 | IMM-g1->KO  |
| d_Bacteria;p_Firmicutes;c_Clostridia;o_Peptococcales;f_Peptococcaceae;g_uncultured                                                     | 1.44342208 | 0.16707675 | 0.2206674  | IMM-g1->KO  |
| d_Bacteria;p_Firmicutes;c_Clostridia;o_Peptostreptococcales-Tissierellales;f_Anaerovoracaceae;g_Family_XIII_AD3011_group               | -1.2835328 | 0.20881018 | 0.27067987 | NIMM-g1->WT |
| d_Bacteria;p_Firmicutes;c_Clostridia;o_Lachnospirales;f_Lachnospiraceae;g_Eisenbergiella                                               | -1.0839114 | 0.28662371 | 0.36479382 | NIMM-g1->WT |
| d_Bacteria;p_Firmicutes;c_Bacilli;o_Erysipelotrichales;f_Erysipelotrichaceae;g_Holdemania                                              | -1.042551  | 0.30451493 | 0.37592945 | NIMM-g1->WT |
| d_Bacteria;p_Firmicutes;c_Clostridia;o_Oscillospirales;f_Ruminococcaceae;g_Anaerotruncus                                               | -1.0421147 | 0.30611398 | 0.37592945 | NIMM-g1->WT |
| d_Bacteria;p_Firmicutes;c_Bacilli;o_Lactobacillales;f_Streptococcaceae;g_Streptococcus                                                 |            | 1          | 0.39310667 | IMM-g1->KO  |
| d_Bacteria;p_Firmicutes;c_Clostridia;o_Oscillospirales;f_Ruminococcaceae;g_DTU089                                                      |            | -1         | 0.39310667 | NIMM-g1->WT |
| d_Bacteria;p_Proteobacteria;c_Gammaproteobacteria;o_Vibrionales;f_Vibrionaceae;g_Vibrio                                                | -0.968239  | 0.33995625 | 0.39661562 | NIMM-g1->WT |
| d_Bacteria;p_Actinobacteriota;c_Coriobacteriia;o_Coriobacteriales;f_Coriobacteriaceae;g_Collinsella                                    | -0.750356  | 0.46168351 | 0.52980075 | NIMM-g1->WT |
| d_Bacteria;p_Firmicutes;c_Clostridia;o_Oscillospirales;f_Butyricocccaceae;g_Butyricoccus                                               | -0.6452283 | 0.52478864 | 0.59250331 | NIMM-g1->WT |
| d_Bacteria;p_Firmicutes;c_Clostridia;o_Oscillospirales;f_Oscillospiraceae;g_Oscillibacter                                              | -0.4558583 | 0.65171703 | 0.72413003 | NIMM-g1->WT |
| d_Bacteria;p_Bacteroidota;c_Bacteroidia;o_Bacteroidales;f_Rikenellaceae;g_Alistipes                                                    | 0.43916399 | 0.66359204 | 0.72580379 | IMM-g1->KO  |
| d_Bacteria;p_Firmicutes;c_Clostridia;o_Oscillospirales;f_[Eubacterium]_coprostanoligenes_group;g_[Eubacterium]_coprostanoligenes_group | 0.37428924 | 0.71052413 | 0.76517983 | IMM-g1->KO  |
| d_Bacteria; ; ; ; ; ;                                                                                                                  |            |            |            |             |
| d_Bacteria;p_Firmicutes;c_Clostridia;o_Oscillospirales;f_Ruminococcaceae;g_Ruminococcus                                                | -0.3094416 | 0.75894443 | 0.80494106 | NIMM-g1->WT |
| d_Bacteria;p_Firmicutes;c_Bacilli;o_Erysipelotrichales;f_Erysipelotrichaceae;g_Turicibacter                                            | -0.2430675 | 0.80942435 | 0.83323095 | NIMM-g1->WT |
| d_Bacteria;p_Bacteroidota;c_Bacteroidia;o_Bacteroidales;f_Bacteroidaceae;g_Bacteroides                                                 | -0.2064573 | 0.83767204 | 0.84981221 | NIMM-g1->WT |
| d_Bacteria;p_Firmicutes;c_Bacilli;o_Erysipelotrichales;f_Erysipelotrichaceae;g_Erysipelotrichaceae                                     | 0.03618591 | 0.9713523  | 0.9713523  | IMM-g1->KO  |

| Operational Taxonomic Unit (Genus) for HM1->WT vs NIMM-g1->WT Comparison                                                               | T-value      | P-value     | FDR         | Enriched    |
|----------------------------------------------------------------------------------------------------------------------------------------|--------------|-------------|-------------|-------------|
| d_Bacteria;p_Proteobacteria;c_Gammaproteobacteria;o_Vibrionales;f_Vibrionaceae;g_Vibrio                                                | 5.39001366   | 4.40E-05    | 0.002903623 | HM1->WT     |
| d_Bacteria;p_Actinobacteriota;c_Coriobacteriia;o_Coriobacteriales;f_Coriobacteriaceae;g_Collinsella                                    | 4.61690007   | 0.000128257 | 0.004232496 | HM1->WT     |
| d_Bacteria;p_Firmicutes;c_Clostridia;o_Lachnospirales;f_Lachnospiraceae;g_Blautia                                                      | 4.286841959  | 0.00029081  | 0.005215912 | HM1->WT     |
| d_Bacteria;p_Firmicutes;c_Clostridia;o_Lachnospirales;f_Lachnospiraceae;g_[Ruminococcus]_gnavus_group                                  | 4.32005584   | 0.000316116 | 0.005215912 | HM1->WT     |
| d_Bacteria;p_Actinobacteriota;c_Coriobacteriia;o_Coriobacteriales;f_Eggerthellaceae;g_Adlercreutzia                                    | 3.262255261  | 0.003907314 | 0.051576548 | HM1->WT     |
| d_Bacteria;p_Firmicutes;c_Clostridia;o_Oscillospirales;f_Oscillospiraceae;g_Flavonifractor                                             | -3.08615967  | 0.013720324 | 0.126423555 | NIMM-g1->WT |
| d_Bacteria;p_Firmicutes;c_Clostridia;o_Lachnospirales;f_Lachnospiraceae;g_Lachnospiraceae_UCG-008                                      | -3.089147584 | 0.014565678 | 0.126423555 | NIMM-g1->WT |
| d_Bacteria;p_Firmicutes;c_Clostridia;o_Peptostreptococcales-Tissierellales;f_Peptostreptococcaeae;g_Clostridioides                     | -3.19237101  | 0.015324067 | 0.126423555 | NIMM-g1->WT |
| d_Bacteria;p_Firmicutes;c_Clostridia;o_Oscillospirales;f_Ruminococcaceae;g_Phocae                                                      | -2.540800575 | 0.021105423 | 0.14119397  | NIMM-g1->WT |
| d_Bacteria;p_Firmicutes;c_Bacilli;o_Lactobacillales;f_Enterococcaceae;g_Enterococcus                                                   | 2.472945475  | 0.022995662 | 0.14119397  | HM1->WT     |
| d_Bacteria;p_Actinobacteriota;c_Coriobacteriia;o_Coriobacteriales;f_Eggerthellaceae;g_Eggerthella                                      | 2.427214297  | 0.023532328 | 0.14119397  | HM1->WT     |
| d_Bacteria;p_Firmicutes;c_Bacilli;o_Staphylococcales;f_Staphylococcaceae;g_Staphylococcus                                              | -2.355208076 | 0.02743539  | 0.150894646 | NIMM-g1->WT |
| d_Bacteria;p_Bacteroidota;c_Bacteroidia;o_Bacteroidales;f_Tannerellaceae;g_Parabacteroides                                             | -2.55581732  | 0.031892789 | 0.158836814 | NIMM-g1->WT |
| d_Bacteria;p_Firmicutes;c_Clostridia;o_Oscillospirales;f_[Eubacterium]_coprostanoligenes_group;g_[Eubacterium]_coprostanoligenes_group | -2.267871021 | 0.03692658  | 0.158836814 | NIMM-g1->WT |
| d_Bacteria;p_Firmicutes;c_Clostridia;o_Oscillospirales;f_Ruminococcaceae;g_Faecalibacterium                                            | -2.200106398 | 0.041915882 | 0.178200937 | NIMM-g1->WT |
| d_Bacteria;p_Firmicutes;c_Clostridia;o_Peptostreptococcales-Tissierellales;f_Anaerovoracaceae;g_[Eubacterium]_nodatum_group            | -2.459525947 | 0.043200227 | 0.178200937 | NIMM-g1->WT |
| d_Bacteria;p_Firmicutes;c_Clostridia;o_Lachnospirales;f_Lachnospiraceae_NK4A136_group                                                  | 2.071102057  | 0.051176146 | 0.190008287 | HM1->WT     |
| d_Bacteria;p_Firmicutes;c_Clostridia;o_Oscillospirales;f_Ruminococcaceae;g_Paludicola                                                  | 2.043850934  | 0.053198161 | 0.190008287 | HM1->WT     |
| d_Bacteria;p_Firmicutes;c_Clostridia;o_Lachnospirales;f_Lachnospiraceae;g_Eisenbergiella                                               | -2.114279629 | 0.058545294 | 0.190008287 | NIMM-g1->WT |
| d_Bacteria;p_Firmicutes;c_Clostridia;o_Oscillospirales;f_Butyricicoccaceae;g_Butyricoccus                                              | -2.071718584 | 0.059472499 | 0.190008287 | NIMM-g1->WT |
| d_Bacteria;p_Firmicutes;c_Bacilli;o_Erysipelotrichales;f_Erysipelatoclostridiaceae;g_Erysipelatoclostridium                            | 2.089330198  | 0.060457182 | 0.190008287 | HM1->WT     |
| d_Bacteria;p_Firmicutes;c_Clostridia;o_Lachnospirales;f_Lachnospiraceae;g_Anaerostipes                                                 | 1.950706497  | 0.063380005 | 0.190140016 | HM1->WT     |
| d_Bacteria;p_Actinobacteriota;c_Actinobacteriia;o_Bifidobacteriales;f_Bifidobacteriaceae;g_Bifidobacterium                             | 2.053364079  | 0.073394543 | 0.207469585 | HM1->WT     |
| d_Bacteria;p_Firmicutes;c_Clostridia;o_Lachnospirales;f_Lachnospiraceae;g_[Ruminococcus]_torques_group                                 | -1.957613775 | 0.075443485 | 0.207469585 | NIMM-g1->WT |
| d_Bacteria;p_Proteobacteria;c_Gammaproteobacteria;o_Enterobacteriales;f_Enterobacteriaceae;g_Escherichia-Shigella                      | 1.921094562  | 0.086524281 | 0.222844518 | HM1->WT     |
| d_Bacteria;p_Bacteroidota;c_Bacteroidia;o_Bacteroidales;f_Muribaculaceae;g_Muribaculaceae                                              | -1.794910476 | 0.090468043 | 0.222844518 | NIMM-g1->WT |
| d_Bacteria;p_Firmicutes;c_Clostridia;o_Lachnospirales;f_Lachnospiraceae;g_GCA-900066755                                                | -1.773878376 | 0.093269946 | 0.222844518 | NIMM-g1->WT |
| d_Bacteria;p_Firmicutes;c_Clostridia;o_Oscillospirales;f_Oscillospiraceae;g_Oscillibacter                                              | -1.857945506 | 0.094540099 | 0.222844518 | NIMM-g1->WT |
| d_Bacteria;p_Firmicutes;c_Bacilli;o_Erysipelotrichales;f_Erysipelotrichaceae;g_Holdemania                                              | -1.728775775 | 0.1162651   | 0.26460333  | NIMM-g1->WT |
| d_Bacteria;p_Firmicutes;c_Bacilli;o_Erysipelotrichales;f_Erysipelotrichaceae;g_[Clostridium]_innocuum_group                            | 1.677405449  | 0.12687192  | 0.265907822 | HM1->WT     |
| d_Bacteria;p_Firmicutes;c_Clostridia;o_Oscillospirales;f_Ruminococcaceae;g_Candidatus_Soleaferrea                                      | -1.697506755 | 0.127904314 | 0.27231241  | NIMM-g1->WT |
| d_Bacteria;p_Firmicutes;c_Clostridia;o_Clostridiales;f_Clostridiaceae;g_Clostridium_sensu_stricto_1                                    | 1.589127531  | 0.145287224 | 0.2996549   | HM1->WT     |
| d_Bacteria;p_Firmicutes;c_Bacilli;o_Erysipelotrichales;f_Erysipelotrichaceae;g_Turcibacter                                             | -1.449402349 | 0.165422371 | 0.330844743 | NIMM-g1->WT |
| d_Bacteria;p_Firmicutes;c_Clostridia;o_Oscillospirales;f_[Clostridium]_methylpentosum_group;g_[Clostridium]_methylpentosum_group       | 1.530185112  | 0.176845092 | 0.343287532 | HM1->WT     |
| d_Bacteria;p_Firmicutes;c_Clostridia;o_Lachnospirales;f_Lachnospiraceae;g_Agathobacter                                                 | 1.508617827  | 0.182128537 | 0.343442385 | HM1->WT     |
| d_Bacteria;p_Firmicutes;c_Bacilli;o_Erysipelotrichales;f_Erysipelotrichaceae;g_Dielma                                                  | -1.383357557 | 0.201061003 | 0.394940103 | NIMM-g1->WT |
| d_Bacteria;p_Firmicutes;c_Clostridia;o_Oscillospirales;f_Ruminococcaceae;g_                                                            | -1.323175747 | 0.208608909 | 0.372113189 | NIMM-g1->WT |
| d_Bacteria;p_Firmicutes;c_Clostridia;o_Lachnospirales;f_Lachnospiraceae;g_GCA-900066575                                                | -1.264310475 | 0.2312595   | 0.394940103 | NIMM-g1->WT |
| d_Bacteria;p_Bacteroidota;c_Bacteroidia;o_Bacteroidales;f_Bacteroidaceae;g_Bacteroides                                                 | -1.249381891 | 0.233373697 | 0.394940103 | NIMM-g1->WT |
| d_Bacteria;p_Firmicutes;c_Clostridia;o_Oscillospirales;f_Ruminococcaceae;g_UBA1819                                                     | -1.196364252 | 0.252690272 | 0.413570479 | NIMM-g1->WT |
| d_Bacteria;p_Firmicutes;c_Clostridia;o_Oscillospirales;f_Ruminococcaceae;g_uncultured                                                  | -1.16963908  | 0.256914994 | 0.413570479 | NIMM-g1->WT |
| d_Bacteria;p_Firmicutes;c_Clostridia;o_Oscillospirales;f_Oscillospiraceae;g_uncultured                                                 | -1.102286837 | 0.300198735 | 0.471740869 | NIMM-g1->WT |
| d_Bacteria;p_Firmicutes;c_Clostridia;o_Clostridia_vadinBB60_group;f_Clostridia_vadinBB60_group;g_Clostridia_vadinBB60_group            | -0.96328753  | 0.349482906 | 0.533876526 | NIMM-g1->WT |
| d_Bacteria;p_Firmicutes;c_Clostridia;o_Lachnospirales;f_Lachnospiraceae;g_uncultured                                                   | 1            | 0.355917684 | 0.533876526 | HM1->WT     |
| d_Bacteria;p_Firmicutes;c_Clostridia;o_Lachnospirales;f_Lachnospiraceae;g_                                                             | -0.812290313 | 0.425262743 | 0.623718689 | NIMM-g1->WT |
| d_Bacteria;p_Firmicutes;c_Clostridia;o_Oscillospirales;f_Ruminococcaceae;g_Ruminococcus                                                | 0.795716089  | 0.454527612 | 0.652148313 | HM1->WT     |
| Unassigned; ; ; ; ;                                                                                                                    | -0.745262697 | 0.472925771 | 0.655657466 | NIMM-g1->WT |
| d_Bacteria;p_Firmicutes;c_Clostridia;o_Peptostreptococcales-Tissierellales;f_Anaerovoracaceae;g_Family_XIII_AD3011_group               | 0.723217783  | 0.476841793 | 0.655657466 | HM1->WT     |
| d_Bacteria;p_Actinobacteriota;c_Coriobacteriia;o_Coriobacteriales;f_Eggerthellaceae;g_Gordonibacter                                    | 0.671621236  | 0.509112844 | 0.685764843 | HM1->WT     |
| d_Bacteria;p_Firmicutes;c_Clostridia;o_Oscillospirales;f_Ruminococcaceae;g_Incertae_Sedis                                              | 0.605389713  | 0.551035729 | 0.727367162 | HM1->WT     |
| d_Bacteria;p_Bacteroidota;c_Bacteroidia;o_Bacteroidales;f_Rikenellaceae;g_Alistipes                                                    | -0.588393214 | 0.563288887 | 0.728962089 | NIMM-g1->WT |
| d_Bacteria;p_Firmicutes;c_Clostridia;o_Lachnospirales;f_Lachnospiraceae;g_[Eubacterium]_fissicatena_group                              | 0.549987283  | 0.588260654 | 0.746638522 | HM1->WT     |
| d_Bacteria;p_Firmicutes;c_Clostridia;o_Lachnospirales;f_Lachnospiraceae;g_Sellimonas                                                   | -0.540232664 | 0.602026882 | 0.749693854 | NIMM-g1->WT |
| d_Bacteria;p_Verrucomicrobiota;c_Verrucomicrobiae;o_Verrucomicrobiales;f_Akkermansiaceae;g_Akkermansia                                 | -0.479388331 | 0.641158869 | 0.776990326 | NIMM-g1->WT |
| d_Bacteria;p_Firmicutes;c_Clostridia;o_Lachnospirales;f_Lachnospiraceae;g_Epulisicium                                                  | -0.465478698 | 0.647491938 | 0.776990326 | NIMM-g1->WT |
| d_Bacteria;p_Proteobacteria;c_Gammaproteobacteria;o_Burkholderiales;f_Sutterellaceae;g_Parasutterella                                  | -0.39162871  | 0.699670189 | 0.824611294 | NIMM-g1->WT |
| d_Bacteria;p_Firmicutes;c_Clostridia;o_Oscillospirales;f_Oscillospiraceae;g_Colidextribacter                                           | -0.347661696 | 0.731901721 | 0.847465151 | NIMM-g1->WT |
| d_Bacteria;p_Firmicutes;c_Clostridia;o_Lachnospirales;f_Lachnospiraceae;g_Lachnoclostridium                                            | 0.261478293  | 0.796259814 | 0.891299957 | HM1->WT     |
| d_Bacteria;p_Firmicutes;c_Clostridia;o_Oscillospirales;f_Oscillospiraceae;g_UCG-005                                                    | -0.260538174 | 0.796768144 | 0.891299957 | NIMM-g1->WT |
| d_Bacteria;p_Firmicutes;c_Clostridia;o_Oscillospirales;f_Ruminococcaceae;g_Anaerotruncus                                               | -0.176877776 | 0.862200909 | 0.935929554 | NIMM-g1->WT |
| d_Bacteria;p_Firmicutes;c_Clostridia;o_Lachnospirales;f_Lachnospiraceae;g_Hungatella                                                   | 0.172374826  | 0.865025799 | 0.935929554 | HM1->WT     |
| d_Bacteria;p_Firmicutes;c_Clostridia;o_Clostridiales;f_Clostridiaceae;g_Clostridium_sensu_stricto_13                                   | -0.151918333 | 0.881982787 | 0.938884903 | NIMM-g1->WT |
| d_Bacteria; ; ; ; ;                                                                                                                    | 0.119605242  | 0.906883262 | 0.95006818  | HM1->WT     |
| d_Bacteria;p_Firmicutes;c_Clostridia;o_Lachnospirales;f_Lachnospiraceae;g_Lachnospiraceae                                              | -0.064075758 | 0.94947373  | 0.968182957 | NIMM-g1->WT |
| d_Bacteria;p_Firmicutes;c_Clostridia;o_Monoglobales;f_Monoglobaceae;g_Monoglobus                                                       | 0.048715273  | 0.961997552 | 0.968182957 | HM1->WT     |
| d_Bacteria;p_Firmicutes;c_Clostridia;o_Oscillospirales;f_Ruminococcaceae;g_DTU089                                                      | 0.040487162  | 0.968182957 | 0.968182957 | HM1->WT     |





| Operational Taxonomic Unit (Genus) for NIMM-g1->KO vs NIMM-g1->WT Comparison                                                           | T-value      | P-value     | FDR         | Enriched    |
|----------------------------------------------------------------------------------------------------------------------------------------|--------------|-------------|-------------|-------------|
| d_Bacteria;p_Firmicutes;c_Clostridia;o_Lachnospirales;f_Lachnospiraceae;g_[Ruminococcus]_gnavus_group                                  | 9.747517304  | 6.73E-09    | 4.44E-07    | NIMM-g1->KO |
| d_Bacteria;p_Firmicutes;c_Bacilli;o_Erysipelotrichales;f_Erysipelotrichaceae;g_[Clostridium]_innocuum_group                            | 4.583874401  | 0.000159032 | 0.005248049 | NIMM-g1->KO |
| d_Bacteria;p_Firmicutes;c_Clostridia;o_Lachnospirales;f_Lachnospiraceae;g_Lachnospiraceae_UCG-008                                      | -4.823476523 | 0.000868157 | 0.019099452 | NIMM-g1->WT |
| d_Bacteria;p_Firmicutes;c_Clostridia;o_Monoglobales;f_Monoglobaceae;g_Monoglobus                                                       | -3.556325945 | 0.001707663 | 0.025462462 | NIMM-g1->WT |
| d_Bacteria;p_Firmicutes;c_Clostridia;o_Oscillospirales;f_[Eubacterium]_coprostanoligenes_group;g_[Eubacterium]_coprostanoligenes_group | -3.631690877 | 0.002062062 | 0.025462462 | NIMM-g1->WT |
| d_Bacteria;p_Firmicutes;c_Clostridia;o_Oscillospirales;f_Ruminococcaceae;g_                                                            | -3.578429343 | 0.002314769 | 0.025462462 | NIMM-g1->WT |
| d_Bacteria;p_Firmicutes;c_Clostridia;o_Lachnospirales;f_Lachnospiraceae;g_Blautia                                                      | -3.040965083 | 0.005933843 | 0.055947659 | NIMM-g1->WT |
| d_Bacteria;p_Firmicutes;c_Clostridia;o_Lachnospirales;f_Lachnospiraceae;g_Lachnospiraceae_NK4A136_group                                | -2.879285755 | 0.017875566 | 0.147473423 | NIMM-g1->WT |
| d_Bacteria;p_Firmicutes;c_Clostridia;o_Clostridia_vadinBB60_group;f_Clostridia_vadinBB60_group;g_Clostridia_vadinBB60_group            | -2.513411883 | 0.022326006 | 0.163724046 | NIMM-g1->WT |
| d_Bacteria;p_Proteobacteria;c_Gammaproteobacteria;o_Vibrionales;f_Vibrionaceae;g_Vibrio                                                | -2.381112305 | 0.027144826 | 0.179155854 | NIMM-g1->WT |
| d_Bacteria;p_Firmicutes;c_Bacilli;o_Staphylococcales;f_Staphylococcaceae;g_Staphylococcus                                              | -2.200388204 | 0.038382149 | 0.20808993  | NIMM-g1->WT |
| d_Bacteria;p_Firmicutes;c_Clostridia;o_Oscillospirales;f_Ruminococcaceae;g_Faecalibacterium                                            | -2.200106398 | 0.041915882 | 0.20808993  | NIMM-g1->WT |
| d_Bacteria;p_Firmicutes;c_Clostridia;o_Oscillospirales;f_Ruminococcaceae;g_                                                            | -2.174487418 | 0.044078131 | 0.20808993  | NIMM-g1->WT |
| d_Bacteria;p_Firmicutes;c_Clostridia;o_Lachnospirales;f_Lachnospiraceae;g_Hungatella                                                   | 2.294676006  | 0.027288776 | 0.20808993  | NIMM-g1->KO |
| d_Bacteria;p_Firmicutes;c_Clostridia;o_Clostridiales;f_Clostridiaceae;g_Clostridium_sensu_stricto_1                                    | 2.304306082  | 0.047293166 | 0.20808993  | NIMM-g1->KO |
| Unassigned; ; ; ; ;                                                                                                                    | -2.058412178 | 0.054260084 | 0.223822846 | NIMM-g1->WT |
| d_Bacteria;p_Proteobacteria;c_Gammaproteobacteria;o_Burkholderiales;f_Sutterellaceae;g_Parasutterella                                  | -1.957228038 | 0.066947315 | 0.246400112 | NIMM-g1->WT |
| d_Bacteria;p_Firmicutes;c_Clostridia;o_Oscillospirales;f_Ruminococcaceae;g_UBA1819                                                     | -1.924446848 | 0.068185995 | 0.246400112 | NIMM-g1->WT |
| d_Bacteria;p_Actinobacteriota;c_Coriobacteriia;o_Coriobacteriales;f_Coriobacteriaceae;g_Collinsella                                    | 1.994736632  | 0.070933365 | 0.246400112 | NIMM-g1->KO |
| d_Bacteria;p_Bacteroidota;c_Bacteroidia;o_Bacteroidales;f_Muribaculaceae;g_Muribaculaceae                                              | -1.794910476 | 0.090468043 | 0.298544541 | NIMM-g1->WT |
| d_Bacteria;p_Firmicutes;c_Clostridia;o_Oscillospirales;f_Ruminococcaceae;g_Incertae_Sedis                                              | -1.897592221 | 0.10286771  | 0.305909421 | NIMM-g1->WT |
| d_Bacteria;p_Firmicutes;c_Clostridia;o_Lachnospirales;f_Lachnospiraceae;g_Epulisicium                                                  | -1.71650829  | 0.104232808 | 0.305909421 | NIMM-g1->WT |
| d_Bacteria;p_Firmicutes;c_Clostridia;o_Lachnospirales;f_Lachnospiraceae;g_Lachnospiraceae                                              | -1.744208467 | 0.106604798 | 0.305909421 | NIMM-g1->WT |
| d_Bacteria;p_Firmicutes;c_Bacilli;o_Erysipelotrichales;f_Erysipelotrichaceae;g_Dielma                                                  | -1.674504721 | 0.113254076 | 0.307069328 | NIMM-g1->WT |
| d_Bacteria;p_Firmicutes;c_Clostridia;o_Oscillospirales;f_Ruminococcaceae;g_Anaerotruncus                                               | 1.713621156  | 0.116314139 | 0.307069328 | NIMM-g1->KO |
| d_Bacteria;p_Bacteroidota;c_Bacteroidia;o_Bacteroidales;f_Bacteroidaceae;g_Bacteroides                                                 | -1.561384996 | 0.138351126 | 0.351199013 | NIMM-g1->WT |
| d_Bacteria;p_Firmicutes;c_Clostridia;o_Lachnospirales;f_Lachnospiraceae;g_[Ruminococcus]_torques_group                                 | -1.48006807  | 0.161093403 | 0.3764785   | NIMM-g1->WT |
| d_Bacteria;p_Firmicutes;c_Bacilli;o_Erysipelotrichales;f_Erysipelotrichaceae;g_Erysipelotrichaceae                                     | 1.539198792  | 0.16216034  | 0.3764785   | NIMM-g1->KO |
| d_Bacteria;p_Firmicutes;c_Bacilli;o_Erysipelotrichales;f_Erysipelotrichaceae;g_Turicibacter                                            | -1.449402349 | 0.165422371 | 0.3764785   | NIMM-g1->WT |
| d_Bacteria;p_Firmicutes;c_Clostridia;o_Lachnospirales;f_Lachnospiraceae;g_GCA-900066755                                                | -1.371678652 | 0.197749065 | 0.435047943 | NIMM-g1->WT |
| d_Bacteria;p_Actinobacteriota;c_Coriobacteriia;o_Coriobacteriales;f_Eggerthellaceae;g_Gordonibacter                                    | -1.253586731 | 0.222613633 | 0.473951606 | NIMM-g1->WT |
| d_Bacteria;p_Firmicutes;c_Clostridia;o_Oscillospirales;f_Ruminococcaceae;g_Candidatus_Soleaferrea                                      | -1.163419826 | 0.275713582 | 0.548036428 | NIMM-g1->WT |
| d_Bacteria;p_Firmicutes;c_Clostridia;o_Lachnospirales;f_Lachnospiraceae;g_[Eubacterium]_fissicatena_group                              | -1.152886227 | 0.28006691  | 0.548036428 | NIMM-g1->WT |
| d_Bacteria;p_Firmicutes;c_Clostridia;o_Oscillospirales;f_Oscillospiraceae;g_uncultured                                                 | -1.132695171 | 0.282321796 | 0.548036428 | NIMM-g1->WT |
| d_Bacteria;p_Firmicutes;c_Clostridia;o_Lachnospirales;f_Lachnospiraceae;g_Sellimonas                                                   | -1.087198688 | 0.310640267 | 0.582743739 | NIMM-g1->WT |
| d_Bacteria;p_Firmicutes;c_Clostridia;o_Oscillospirales;f_Ruminococcaceae;g_GCA-900066755                                               | -1           | 0.331332762 | 0.582743739 | NIMM-g1->WT |
| d_Bacteria;p_Firmicutes;c_Clostridia;o_Lachnospirales;f_Lachnospiraceae;g_Eisenbergiella                                               | 0.970670853  | 0.344043706 | 0.582743739 | NIMM-g1->KO |
| d_Bacteria;p_Firmicutes;c_Clostridia;o_Lachnospirales;f_Lachnospiraceae;g_Agathobacter                                                 | 1            | 0.355917684 | 0.582743739 | NIMM-g1->KO |
| d_Bacteria;p_Firmicutes;c_Clostridia;o_Clostridiales;f_[Clostridium]_methylpentosum_group;g_[Clostridium]_methylpentosum_group         | 1            | 0.355917684 | 0.582743739 | NIMM-g1->KO |
| d_Bacteria;p_Actinobacteriota;c_Coriobacteriia;o_Coriobacteriales;f_Eggerthellaceae;g_                                                 | 1            | 0.355917684 | 0.582743739 | NIMM-g1->KO |
| d_Bacteria;p_Proteobacteria;c_Gammaproteobacteria;o_Enterobacteriales;f_Enterobacteriaceae;g_Escherichia-Shigella                      | -0.928490344 | 0.367854278 | 0.582743739 | NIMM-g1->WT |
| d_Bacteria;p_Firmicutes;c_Clostridia;o_Oscillospirales;f_Oscillospiraceae;g_UCG-005                                                    | -0.928463849 | 0.370836925 | 0.582743739 | NIMM-g1->WT |
| d_Bacteria;p_Firmicutes;c_Bacilli;o_Erysipelotrichales;f_Erysipelotrichaceae;g_Holdemania                                              | 0.826996194  | 0.427102126 | 0.6555521   | NIMM-g1->KO |
| d_Bacteria;p_Firmicutes;c_Clostridia;o_Oscillospirales;f_Ruminococcaceae;g_Phocea                                                      | 0.770545325  | 0.460627699 | 0.676345039 | NIMM-g1->KO |
| d_Bacteria;p_Firmicutes;c_Clostridia;o_Lachnospirales;f_Lachnospiraceae;g_Lachnoclostridium                                            | -0.750606434 | 0.461144345 | 0.676345039 | NIMM-g1->WT |
| d_Bacteria;p_Firmicutes;c_Clostridia;o_Oscillospirales;f_Ruminococcaceae;g_uncultured                                                  | -0.741531932 | 0.471685184 | 0.676765698 | NIMM-g1->WT |
| d_Bacteria;p_Firmicutes;c_Clostridia;o_Oscillospirales;f_Oscillospiraceae;g_Oscillibacter                                              | 0.653705889  | 0.529535731 | 0.743603366 | NIMM-g1->KO |
| d_Bacteria;p_Firmicutes;c_Clostridia;o_Oscillospirales;f_Ruminococcaceae;g_DTU089                                                      | 0.628606617  | 0.548469123 | 0.745117315 | NIMM-g1->KO |
| d_Bacteria;p_Firmicutes;c_Clostridia;o_Oscillospirales;f_Ruminococcaceae;g_Paludicola                                                  | 0.592159563  | 0.56442058  | 0.745117315 | NIMM-g1->KO |
| d_Bacteria;p_Firmicutes;c_Clostridia;o_Oscillospirales;f_Oscillospiraceae;g_Flavonifractor                                             | -0.587725192 | 0.564482814 | 0.745117315 | NIMM-g1->WT |
| d_Bacteria;p_Firmicutes;c_Clostridia;o_Peptostreptococcales-Tissierellales;f_Peptostreptococcaceae;g_Clostridioides                    | -0.580659446 | 0.579961533 | 0.750538454 | NIMM-g1->WT |
| d_Bacteria;p_Firmicutes;c_Clostridia;o_Peptostreptococcales-Tissierellales;f_Anaerovoracaceae;g_Family_XIII_AD3011_group               | -0.544174918 | 0.598025363 | 0.759032192 | NIMM-g1->WT |
| d_Bacteria;p_Firmicutes;c_Clostridia;o_Oscillospirales;f_Oscillospiraceae;g_Colidextribacter                                           | -0.51542006  | 0.612471653 | 0.762700549 | NIMM-g1->WT |
| d_Bacteria;p_Firmicutes;c_Clostridia;o_Lachnospirales;f_Lachnospiraceae;g_Anaerostipes                                                 | 0.489935148  | 0.638669325 | 0.774242231 | NIMM-g1->KO |
| d_Bacteria;p_Firmicutes;c_Clostridia;o_Lachnospirales;f_Lachnospiraceae;g_GCA-900066575                                                | -0.468006719 | 0.645201859 | 0.774242231 | NIMM-g1->WT |
| d_Bacteria;p_Actinobacteriota;c_Coriobacteriia;o_Coriobacteriales;f_Eggerthellaceae;g_Eggerthella                                      | 0.375326449  | 0.710874832 | 0.832007868 | NIMM-g1->KO |
| d_Bacteria;p_Bacteroidota;c_Bacteroidia;o_Bacteroidales;f_Tannerellaceae;g_Parabacteroides                                             | -0.369345811 | 0.718552249 | 0.832007868 | NIMM-g1->WT |
| d_Bacteria;p_Firmicutes;c_Clostridia;o_Lachnospirales;f_Lachnospiraceae;g_                                                             | -0.33246333  | 0.742570256 | 0.84499374  | NIMM-g1->WT |
| d_Bacteria;p_Firmicutes;c_Clostridia;o_Peptostreptococcales-Tissierellales;f_Anaerovoracaceae;g_[Eubacterium]_nodatum_group            | -0.25640813  | 0.805336608 | 0.900885019 | NIMM-g1->WT |
| d_Bacteria;p_Actinobacteriota;c_Actinobacteriia;o_Bifidobacteriales;f_Bifidobacteriaceae;g_Bifidobacterium                             | -0.203624349 | 0.840545253 | 0.910427701 | NIMM-g1->WT |
| d_Bacteria;p_Bacteroidota;c_Bacteroidia;o_Bacteroidales;f_Rikenellaceae;g_Alistipes                                                    | -0.194816141 | 0.848360855 | 0.910427701 | NIMM-g1->WT |
| d_Bacteria;p_Firmicutes;c_Clostridia;o_Oscillospirales;f_Butyricoccaceae;g_Butyricoccus                                                | 0.163676679  | 0.871421269 | 0.910427701 | NIMM-g1->KO |
| d_Bacteria;p_Firmicutes;c_Clostridia;o_Clostridiales;f_Clostridiaceae;g_Clostridium_sensu_stricto_13                                   | -0.151100628 | 0.882573638 | 0.910427701 | NIMM-g1->WT |
| d_Bacteria;p_Firmicutes;c_Bacilli;o_Lactobacillales;f_Enterococcaceae;g_Enterococcus                                                   | 0.150563299  | 0.882838983 | 0.910427701 | NIMM-g1->KO |
| d_Bacteria;p_Actinobacteriota;c_Coriobacteriia;o_Coriobacteriales;f_Eggerthellaceae;g_Adlercreutzia                                    | -0.053127443 | 0.958447614 | 0.973192962 | NIMM-g1->WT |
| d_Bacteria;p_Verrucomicrobiota;c_Verrucomicrobiae;o_Verrucomicrobiales;f_Akkermansiaceae;g_Akkermansia                                 | -0.030585223 | 0.975866273 | 0.975866273 | NIMM-g1->WT |
